# Supplementary material
Source: publisher site journal article supplement (https://www.spandidos-publications.com/8678/downloadSupplementary)
Supplement: Supplementary file 1 [file downloadSupplementary]

## Sheet: Sheet1
Table SI. C0-C5 marker genes.
	p_val	avg_log2FC	pct.1	pct.2	p_val_adj	cluster	gene
KRT19	1.69859e-104	1.00754	0.972	0.878	4.27874e-100	0	KRT19
GABRP	1.17927e-92	1.18315	0.91	0.6	2.97057e-88	0	GABRP
GPRC5A	7.31096e-87	0.97727	0.938	0.745	1.84163e-82	0	GPRC5A
TMC5	3.63525e-85	0.993972	0.937	0.754	9.1572e-81	0	TMC5
CYP3A5	3.73852e-62	1.27979	0.735	0.447	9.41734e-58	0	CYP3A5
CD55	1.89984e-61	1.22556	0.865	0.665	4.7857e-57	0	CD55
MYH14	2.14134e-61	0.886375	0.894	0.72	5.39403e-57	0	MYH14
S100P	3.73599e-61	0.834439	0.952	0.805	9.41095e-57	0	S100P
KRT8	1.9943e-60	0.729251	0.975	0.914	5.02364e-56	0	KRT8
ANXA2	1.62495e-57	0.667548	0.972	0.864	4.09326e-53	0	ANXA2
TSPAN1	4.78822e-56	0.843911	0.834	0.655	1.20615e-51	0	TSPAN1
LGALS3	1.48166e-54	0.834599	0.921	0.791	3.7323e-50	0	LGALS3
APOL1	2.91729e-54	1.50784	0.758	0.525	7.34866e-50	0	APOL1
ITGA6	2.2721e-53	0.788005	0.903	0.721	5.72342e-49	0	ITGA6
SEMA3B	8.46127e-52	1.61109	0.626	0.355	2.13139e-47	0	SEMA3B
ITGB4	1.08933e-50	0.931384	0.806	0.601	2.74403e-46	0	ITGB4
PIGR	1.1304e-50	0.881905	0.963	0.783	2.84748e-46	0	PIGR
RARRES3	1.34394e-50	1.12158	0.864	0.667	3.38539e-46	0	RARRES3
MYOF	2.44798e-50	0.970205	0.816	0.589	6.16646e-46	0	MYOF
MUC1	5.89898e-50	0.767383	0.962	0.824	1.48595e-45	0	MUC1
SLC6A14	1.24039e-49	1.68328	0.564	0.29	3.12453e-45	0	SLC6A14
POF1B	2.84571e-49	0.937677	0.819	0.612	7.16834e-45	0	POF1B
NEAT1	8.41637e-49	0.692814	0.966	0.833	2.12008e-44	0	NEAT1
LAMA3	2.23697e-48	1.22734	0.7	0.467	5.63492e-44	0	LAMA3
AGR2	2.55695e-48	0.690166	0.965	0.838	6.44096e-44	0	AGR2
AHNAK	4.63781e-48	0.770577	0.928	0.736	1.16826e-43	0	AHNAK
RNF213	6.84798e-48	1.03619	0.925	0.747	1.72501e-43	0	RNF213
TRIM29	1.02588e-47	1.10399	0.76	0.506	2.58418e-43	0	TRIM29
TSPAN8	2.35645e-47	0.606505	0.923	0.785	5.9359e-43	0	TSPAN8
ATP1B1	1.03147e-46	0.735781	0.942	0.842	2.59826e-42	0	ATP1B1
PDZK1IP1	3.06186e-46	0.81872	0.809	0.639	7.71282e-42	0	PDZK1IP1
ANXA4	3.71102e-46	0.702479	0.902	0.77	9.34806e-42	0	ANXA4
S100A6	1.66142e-45	0.696153	0.987	0.942	4.18511e-41	0	S100A6
BHLHE40	3.85149e-45	1.02205	0.785	0.571	9.70191e-41	0	BHLHE40
ITGA2	1.97656e-44	1.13009	0.737	0.522	4.97896e-40	0	ITGA2
MALAT1	1.28405e-43	0.56031	0.995	0.942	3.23453e-39	0	MALAT1
CLDN7	1.42438e-43	0.738897	0.898	0.684	3.58802e-39	0	CLDN7
KRT7	9.27329e-43	0.979817	0.834	0.631	2.33594e-38	0	KRT7
KRT18	7.41397e-42	0.639792	0.976	0.907	1.86758e-37	0	KRT18
AHNAK2	8.52016e-42	1.30949	0.579	0.324	2.14623e-37	0	AHNAK2
TSPAN3	8.65865e-42	0.566823	0.904	0.784	2.18111e-37	0	TSPAN3
LMO7	4.38389e-41	0.866939	0.848	0.697	1.1043e-36	0	LMO7
LGALS4	2.04873e-40	0.71881	0.837	0.684	5.16074e-36	0	LGALS4
TRAK1	1.32194e-39	0.904077	0.762	0.568	3.32996e-35	0	TRAK1
MLPH	1.51837e-39	0.882417	0.756	0.56	3.82476e-35	0	MLPH
MUC13	1.54209e-39	0.821059	0.759	0.547	3.88452e-35	0	MUC13
CXCL1	7.48645e-39	0.869586	0.835	0.605	1.88584e-34	0	CXCL1
MUC5B	7.53143e-39	1.3157	0.715	0.487	1.89717e-34	0	MUC5B
MUC4	1.01431e-38	1.26931	0.602	0.364	2.55504e-34	0	MUC4
HLA-A	1.06213e-38	0.406791	0.975	0.922	2.67551e-34	0	HLA-A
TRIM31	1.27462e-38	1.21039	0.696	0.483	3.21076e-34	0	TRIM31
GBP3	1.39472e-38	0.993878	0.662	0.451	3.51329e-34	0	GBP3
S100A14	1.42898e-38	0.696512	0.886	0.706	3.59961e-34	0	S100A14
RNF19A	4.82971e-38	1.05001	0.783	0.603	1.2166e-33	0	RNF19A
PLEC	5.90922e-38	0.866149	0.861	0.69	1.48853e-33	0	PLEC
PLS1	1.92192e-37	0.781612	0.774	0.611	4.84131e-33	0	PLS1
EPS8L1	2.3456e-37	1.42371	0.54	0.315	5.90856e-33	0	EPS8L1
TPM1	4.11243e-37	0.669833	0.886	0.766	1.03592e-32	0	TPM1
LAMB3	4.80736e-37	0.764428	0.791	0.594	1.21097e-32	0	LAMB3
CCL28	6.07159e-37	1.43788	0.541	0.322	1.52943e-32	0	CCL28
MXRA5	8.40312e-37	1.611	0.489	0.251	2.11675e-32	0	MXRA5
MUC16	1.21142e-36	2.52015	0.35	0.13	3.05156e-32	0	MUC16
TMBIM1	1.7442e-36	0.806491	0.796	0.651	4.39365e-32	0	TMBIM1
SERPINB1	1.8942e-36	0.758408	0.867	0.766	4.77148e-32	0	SERPINB1
MISP	4.36855e-36	0.88905	0.757	0.55	1.10044e-31	0	MISP
TCF7L2	2.89682e-35	0.777619	0.823	0.666	7.2971e-31	0	TCF7L2
LEMD1	4.886e-35	1.47038	0.45	0.227	1.23078e-30	0	LEMD1
PLAUR	5.00239e-35	0.886609	0.741	0.53	1.2601e-30	0	PLAUR
HSPG2	5.43768e-35	0.950379	0.697	0.482	1.36975e-30	0	HSPG2
CCND1	1.0151e-34	0.633109	0.877	0.689	2.55705e-30	0	CCND1
ADAM9	1.44994e-34	0.737289	0.79	0.637	3.6524e-30	0	ADAM9
COL6A1	1.98908e-34	1.4261	0.497	0.274	5.01048e-30	0	COL6A1
RNF145	2.36412e-34	0.867024	0.759	0.577	5.95521e-30	0	RNF145
GBP2	3.06315e-34	1.05825	0.622	0.397	7.71608e-30	0	GBP2
TAOK3	3.17525e-34	0.788397	0.766	0.609	7.99844e-30	0	TAOK3
ERBB3	4.29039e-34	0.818267	0.8	0.639	1.08075e-29	0	ERBB3
BTN3A1	4.89341e-34	1.16889	0.614	0.398	1.23265e-29	0	BTN3A1
LDLR	6.73161e-34	0.810697	0.823	0.637	1.69569e-29	0	LDLR
SERPINB5	7.87236e-34	0.94759	0.704	0.498	1.98305e-29	0	SERPINB5
CMPK1	8.89855e-34	0.562723	0.867	0.75	2.24154e-29	0	CMPK1
SLC44A4	1.13888e-33	0.726812	0.765	0.574	2.86885e-29	0	SLC44A4
CD24	1.37265e-33	0.587928	0.94	0.867	3.45771e-29	0	CD24
MVP	1.41082e-33	0.838532	0.744	0.576	3.55384e-29	0	MVP
LGALS3BP	1.6035e-33	0.628972	0.899	0.754	4.03923e-29	0	LGALS3BP
DNM2	1.6267e-33	0.942251	0.721	0.524	4.09765e-29	0	DNM2
RASSF6	2.59009e-33	0.887223	0.67	0.464	6.52445e-29	0	RASSF6
IFI27	2.63715e-33	0.423224	0.945	0.856	6.64298e-29	0	IFI27
CDC42EP5	3.94036e-33	0.835844	0.681	0.478	9.92577e-29	0	CDC42EP5
GSKIP	4.84301e-33	0.874092	0.71	0.513	1.21996e-28	0	GSKIP
TYMP	1.1672e-32	0.929617	0.714	0.513	2.94019e-28	0	TYMP
TMPRSS4	1.18351e-32	0.867161	0.7	0.515	2.98127e-28	0	TMPRSS4
ACTN4	1.24511e-32	0.58684	0.905	0.747	3.13644e-28	0	ACTN4
TXNIP	1.62787e-32	1.0887	0.766	0.608	4.1006e-28	0	TXNIP
BIRC3	2.32588e-32	0.657154	0.834	0.633	5.85888e-28	0	BIRC3
JUP	2.47387e-32	0.643612	0.843	0.72	6.23168e-28	0	JUP
KIF13A	4.3482e-32	0.801346	0.735	0.528	1.09531e-27	0	KIF13A
FAT1	6.1194e-32	0.774235	0.826	0.628	1.54148e-27	0	FAT1
CXCL3	8.70523e-32	0.697802	0.85	0.66	2.19285e-27	0	CXCL3
ARFGAP3	1.90424e-31	0.929361	0.696	0.538	4.79678e-27	0	ARFGAP3
CTNND1	2.42984e-31	0.614552	0.864	0.724	6.12077e-27	0	CTNND1
RAB11FIP1	3.00307e-31	0.587485	0.882	0.767	7.56474e-27	0	RAB11FIP1
SHROOM3	2.4843e-30	0.759557	0.796	0.659	6.25795e-26	0	SHROOM3
AL121761.2	2.70918e-30	0.881647	0.67	0.469	6.82444e-26	0	AL121761.2
TIMP1	4.12131e-30	0.750246	0.766	0.615	1.03816e-25	0	TIMP1
SH3BGRL3	5.03249e-30	0.619342	0.86	0.744	1.26768e-25	0	SH3BGRL3
CLMN	5.29239e-30	1.09995	0.604	0.424	1.33315e-25	0	CLMN
PRSS22	1.21769e-29	1.18912	0.48	0.264	3.06735e-25	0	PRSS22
KLF5	1.22641e-29	0.525364	0.872	0.729	3.08933e-25	0	KLF5
EZR	1.60127e-29	0.423759	0.965	0.885	4.03359e-25	0	EZR
EMP1	2.92794e-29	1.02281	0.626	0.427	7.37548e-25	0	EMP1
CAST	2.95866e-29	0.567764	0.879	0.78	7.45288e-25	0	CAST
SLC17A5	5.48207e-29	1.17145	0.541	0.353	1.38093e-24	0	SLC17A5
ITGA3	1.07307e-28	0.872589	0.698	0.541	2.70305e-24	0	ITGA3
TRIB2	3.26207e-28	1.16993	0.588	0.404	8.21714e-24	0	TRIB2
LIPH	3.58522e-28	0.784778	0.685	0.505	9.03117e-24	0	LIPH
RASEF	6.00117e-28	0.810456	0.664	0.48	1.51169e-23	0	RASEF
GCC2	1.00794e-27	0.552858	0.855	0.704	2.53901e-23	0	GCC2
TM4SF1	1.19526e-27	0.766647	0.787	0.658	3.01087e-23	0	TM4SF1
CD46	1.78323e-27	0.591984	0.859	0.73	4.49196e-23	0	CD46
ABHD2	2.05435e-27	0.644202	0.807	0.668	5.17491e-23	0	ABHD2
GOLGB1	2.46043e-27	0.530952	0.892	0.743	6.19782e-23	0	GOLGB1
CDCP1	2.82485e-27	0.754812	0.726	0.582	7.11579e-23	0	CDCP1
ZG16B	4.87202e-27	1.19051	0.519	0.334	1.22726e-22	0	ZG16B
TMEM45B	5.85864e-27	0.790997	0.592	0.401	1.47579e-22	0	TMEM45B
ZFP36L2	6.71079e-27	0.454316	0.932	0.819	1.69045e-22	0	ZFP36L2
PHLDA2	7.8961e-27	0.743741	0.817	0.674	1.98903e-22	0	PHLDA2
CAMK2N1	8.76019e-27	0.614106	0.808	0.646	2.20669e-22	0	CAMK2N1
B4GALT5	1.08483e-26	0.622992	0.756	0.604	2.73268e-22	0	B4GALT5
CLTB	1.18002e-26	0.688354	0.752	0.594	2.97248e-22	0	CLTB
PTPRR	1.23523e-26	2.07111	0.296	0.12	3.11154e-22	0	PTPRR
PCSK5	1.58447e-26	1.16681	0.44	0.241	3.99127e-22	0	PCSK5
SLC37A1	2.15044e-26	0.851603	0.663	0.5	5.41696e-22	0	SLC37A1
CORO2A	2.58683e-26	1.11145	0.61	0.434	6.51623e-22	0	CORO2A
SPTBN1	2.71958e-26	0.458055	0.926	0.809	6.85061e-22	0	SPTBN1
WDR45B	3.15592e-26	0.595088	0.82	0.685	7.94975e-22	0	WDR45B
IFI35	3.21223e-26	0.922749	0.521	0.332	8.0916e-22	0	IFI35
LRRFIP1	3.61928e-26	0.53151	0.884	0.75	9.11697e-22	0	LRRFIP1
IFNGR1	5.18674e-26	0.627817	0.702	0.541	1.30654e-21	0	IFNGR1
RRBP1	6.70295e-26	0.408017	0.933	0.814	1.68847e-21	0	RRBP1
TJP3	7.03496e-26	0.877856	0.511	0.318	1.77211e-21	0	TJP3
CCDC68	7.98968e-26	1.11252	0.585	0.409	2.0126e-21	0	CCDC68
PLA2G16	1.22179e-25	0.570262	0.809	0.674	3.07769e-21	0	PLA2G16
SGPP2	1.84936e-25	0.916594	0.614	0.448	4.65854e-21	0	SGPP2
BCAS1	1.96143e-25	0.50809	0.515	0.313	4.94085e-21	0	BCAS1
ISG15	1.97809e-25	0.945499	0.759	0.598	4.9828e-21	0	ISG15
PPA1	2.04844e-25	0.464977	0.892	0.772	5.16001e-21	0	PPA1
TXNDC17	2.10943e-25	0.469102	0.836	0.721	5.31365e-21	0	TXNDC17
HLA-DRB1	2.60417e-25	0.54279	0.844	0.68	6.55991e-21	0	HLA-DRB1
RND3	2.86287e-25	0.627077	0.747	0.581	7.21156e-21	0	RND3
CXCL2	3.38336e-25	0.608445	0.777	0.589	8.52269e-21	0	CXCL2
TCIM	4.195e-25	1.07335	0.463	0.266	1.05672e-20	0	TCIM
FUT2	4.31847e-25	0.950769	0.572	0.395	1.08782e-20	0	FUT2
MT-CO2	4.77939e-25	0.357615	0.976	0.924	1.20393e-20	0	MT-CO2
SLPI	4.94764e-25	0.8289	0.62	0.448	1.24631e-20	0	SLPI
SYT13	5.35095e-25	0.816612	0.646	0.453	1.3479e-20	0	SYT13
ERAP2	7.75376e-25	0.868807	0.672	0.48	1.95317e-20	0	ERAP2
CLINT1	8.06095e-25	0.613124	0.782	0.652	2.03055e-20	0	CLINT1
IFI16	9.10711e-25	0.809905	0.56	0.376	2.29408e-20	0	IFI16
FLNB	1.42219e-24	0.658113	0.781	0.647	3.58249e-20	0	FLNB
SLC25A37	2.26666e-24	0.742017	0.708	0.543	5.70971e-20	0	SLC25A37
CXCL16	2.53426e-24	0.548988	0.724	0.565	6.3838e-20	0	CXCL16
GBP4	2.84465e-24	0.938306	0.637	0.448	7.16567e-20	0	GBP4
DDR1	3.84664e-24	0.584808	0.731	0.587	9.68968e-20	0	DDR1
TAP1	4.03532e-24	0.566489	0.836	0.656	1.0165e-19	0	TAP1
PLCG2	4.17079e-24	1.05622	0.898	0.734	1.05062e-19	0	PLCG2
PMEPA1	6.05936e-24	0.820454	0.642	0.462	1.52635e-19	0	PMEPA1
XAF1	6.5974e-24	0.848113	0.637	0.454	1.66188e-19	0	XAF1
CASP4	6.62923e-24	0.675411	0.687	0.555	1.6699e-19	0	CASP4
LAMC2	9.11422e-24	1.00376	0.561	0.377	2.29587e-19	0	LAMC2
ACBD3	9.39882e-24	0.672916	0.732	0.602	2.36756e-19	0	ACBD3
VPS13C	1.10697e-23	0.666276	0.767	0.61	2.78847e-19	0	VPS13C
AHCYL2	1.19319e-23	0.788211	0.627	0.448	3.00565e-19	0	AHCYL2
MMP7	2.7358e-23	0.940079	0.576	0.395	6.89147e-19	0	MMP7
MAP3K13	2.78643e-23	0.529425	0.716	0.596	7.01901e-19	0	MAP3K13
RHOF	3.14675e-23	1.02044	0.532	0.352	7.92666e-19	0	RHOF
CEBPD	3.58602e-23	0.540656	0.715	0.565	9.03319e-19	0	CEBPD
CLDN4	4.09236e-23	0.291487	0.867	0.72	1.03087e-18	0	CLDN4
GOLM1	4.78997e-23	0.659752	0.839	0.72	1.20659e-18	0	GOLM1
CD74	5.50889e-23	0.537535	0.939	0.833	1.38769e-18	0	CD74
TNFRSF14-AS1	6.61445e-23	1.18865	0.421	0.247	1.66618e-18	0	TNFRSF14-AS1
MXD1	6.63813e-23	0.670736	0.696	0.539	1.67214e-18	0	MXD1
EFHD2	6.85964e-23	0.532856	0.788	0.681	1.72794e-18	0	EFHD2
HS3ST1	9.92791e-23	1.14114	0.481	0.311	2.50084e-18	0	HS3ST1
OCIAD2	1.33081e-22	0.615679	0.778	0.683	3.3523e-18	0	OCIAD2
PRSS3	1.49475e-22	0.593132	0.726	0.567	3.76526e-18	0	PRSS3
MT-CYB	1.75224e-22	0.369405	0.977	0.906	4.4139e-18	0	MT-CYB
SAMD9	1.75875e-22	1.12774	0.48	0.299	4.43029e-18	0	SAMD9
ERN2	1.80419e-22	0.934375	0.55	0.374	4.54475e-18	0	ERN2
ANXA11	1.89315e-22	0.45042	0.851	0.744	4.76883e-18	0	ANXA11
PDLIM5	1.98982e-22	0.50988	0.711	0.576	5.01235e-18	0	PDLIM5
CLDN18	2.22972e-22	0.559444	0.882	0.789	5.61666e-18	0	CLDN18
EPHA2	2.52765e-22	0.69014	0.627	0.461	6.36714e-18	0	EPHA2
CD2AP	2.73645e-22	0.518096	0.825	0.7	6.89312e-18	0	CD2AP
CDH17	3.00015e-22	1.11551	0.449	0.268	7.55738e-18	0	CDH17
LIMA1	3.44934e-22	0.539243	0.722	0.57	8.68889e-18	0	LIMA1
HLA-E	7.2592e-22	0.312941	0.945	0.871	1.82859e-17	0	HLA-E
CAV2	7.9026e-22	0.971573	0.532	0.358	1.99067e-17	0	CAV2
MBNL2	8.35944e-22	0.630366	0.715	0.568	2.10574e-17	0	MBNL2
KLK10	9.27161e-22	0.911246	0.627	0.468	2.33552e-17	0	KLK10
HLA-B	1.03389e-21	0.287076	0.967	0.912	2.60437e-17	0	HLA-B
AC009133.1	1.08371e-21	0.918366	0.415	0.239	2.72987e-17	0	AC009133.1
SLC35A3	1.16816e-21	0.630165	0.741	0.601	2.94261e-17	0	SLC35A3
TFAP2A	2.55766e-21	1.00654	0.544	0.389	6.44274e-17	0	TFAP2A
SDCBP2	3.98807e-21	0.516076	0.62	0.45	1.00459e-16	0	SDCBP2
SMIM22	4.32729e-21	0.376924	0.778	0.685	1.09004e-16	0	SMIM22
NBR1	4.4535e-21	0.671218	0.603	0.442	1.12184e-16	0	NBR1
DSG2	4.70379e-21	0.462384	0.851	0.746	1.18488e-16	0	DSG2
CMBL	7.91759e-21	0.552967	0.726	0.563	1.99444e-16	0	CMBL
PNPLA2	8.59764e-21	0.716567	0.667	0.527	2.16574e-16	0	PNPLA2
HLA-DRB5	8.85644e-21	0.663565	0.742	0.591	2.23094e-16	0	HLA-DRB5
SLC22A18	1.18002e-20	0.919794	0.524	0.36	2.97247e-16	0	SLC22A18
ELOB	1.20193e-20	0.387501	0.883	0.792	3.02766e-16	0	ELOB
MCU	1.23925e-20	0.681912	0.653	0.496	3.12166e-16	0	MCU
APOL6	1.48645e-20	0.489363	0.823	0.651	3.74438e-16	0	APOL6
TFF3	1.68113e-20	1.0941	0.606	0.441	4.23477e-16	0	TFF3
SREBF1	1.93889e-20	0.70304	0.705	0.545	4.88407e-16	0	SREBF1
PLXNB2	2.15123e-20	0.499806	0.768	0.628	5.41895e-16	0	PLXNB2
TMC4	2.41965e-20	0.884858	0.449	0.284	6.0951e-16	0	TMC4
ZDHHC7	3.00772e-20	0.863441	0.57	0.427	7.57645e-16	0	ZDHHC7
CLDN12	3.08539e-20	0.690265	0.535	0.368	7.7721e-16	0	CLDN12
KLF2	3.35938e-20	0.432404	0.653	0.455	8.46227e-16	0	KLF2
ZBTB7A	3.40057e-20	0.573493	0.798	0.683	8.56602e-16	0	ZBTB7A
CGN	5.69392e-20	0.826965	0.509	0.347	1.4343e-15	0	CGN
CIB1	5.86706e-20	0.382469	0.832	0.71	1.47791e-15	0	CIB1
DGAT1	6.58939e-20	0.61278	0.718	0.57	1.65987e-15	0	DGAT1
IRF1	8.16629e-20	0.499827	0.865	0.766	2.05709e-15	0	IRF1
CCND2	9.85321e-20	0.635304	0.668	0.487	2.48202e-15	0	CCND2
TRAFD1	1.10841e-19	1.02734	0.407	0.245	2.79209e-15	0	TRAFD1
TMF1	1.27649e-19	0.645119	0.716	0.584	3.21547e-15	0	TMF1
CEACAM5	1.75521e-19	1.19271	0.345	0.184	4.42137e-15	0	CEACAM5
MAP2K3	1.88327e-19	0.523044	0.714	0.581	4.74396e-15	0	MAP2K3
GPR108	2.26125e-19	0.933991	0.474	0.314	5.69608e-15	0	GPR108
LRP10	2.32715e-19	0.59572	0.705	0.583	5.86209e-15	0	LRP10
PARP14	2.48146e-19	0.495147	0.825	0.678	6.25081e-15	0	PARP14
RAB27B	2.52339e-19	0.559415	0.646	0.503	6.35643e-15	0	RAB27B
NT5C3A	2.61809e-19	0.567736	0.685	0.555	6.59496e-15	0	NT5C3A
CXADR	3.35516e-19	0.551832	0.724	0.569	8.45166e-15	0	CXADR
PARP4	3.66096e-19	0.684671	0.633	0.483	9.22197e-15	0	PARP4
TNFAIP2	4.57361e-19	0.591962	0.687	0.519	1.15209e-14	0	TNFAIP2
SYNE2	4.78248e-19	0.486225	0.942	0.798	1.20471e-14	0	SYNE2
FAM3D	4.95865e-19	0.985259	0.459	0.303	1.24908e-14	0	FAM3D
PLAC8	5.47868e-19	0.77155	0.608	0.476	1.38008e-14	0	PLAC8
PTPRK	6.15169e-19	0.552588	0.714	0.589	1.54961e-14	0	PTPRK
KLK11	8.60063e-19	0.510443	0.592	0.446	2.1665e-14	0	KLK11
NET1	8.66001e-19	0.483527	0.795	0.648	2.18146e-14	0	NET1
ETS2	9.09537e-19	0.623994	0.772	0.635	2.29112e-14	0	ETS2
FXYD3	1.01288e-18	0.471305	0.854	0.811	2.55145e-14	0	FXYD3
KRAS	1.01731e-18	0.697911	0.638	0.51	2.56261e-14	0	KRAS
ONECUT3	1.0481e-18	0.875181	0.504	0.345	2.64016e-14	0	ONECUT3
AKAP13	1.0559e-18	0.356625	0.783	0.643	2.65981e-14	0	AKAP13
MIDN	1.14946e-18	0.426544	0.799	0.686	2.89548e-14	0	MIDN
HLA-DQB1	1.33208e-18	0.516684	0.758	0.603	3.35551e-14	0	HLA-DQB1
SEL1L	1.44663e-18	0.583454	0.731	0.604	3.64405e-14	0	SEL1L
REEP3	1.47277e-18	0.648613	0.697	0.581	3.70991e-14	0	REEP3
CLSTN1	1.61526e-18	0.584213	0.718	0.585	4.06883e-14	0	CLSTN1
CEACAM6	1.76754e-18	1.17212	0.471	0.311	4.45244e-14	0	CEACAM6
PSMB9	2.02101e-18	0.478	0.794	0.614	5.09094e-14	0	PSMB9
SULT1C2	2.04028e-18	0.321654	0.561	0.39	5.13945e-14	0	SULT1C2
PSORS1C1	2.20257e-18	1.25942	0.258	0.12	5.54828e-14	0	PSORS1C1
SAV1	2.50793e-18	0.743244	0.569	0.434	6.31746e-14	0	SAV1
DOCK5	2.61327e-18	0.845188	0.555	0.407	6.58282e-14	0	DOCK5
PKP3	3.99921e-18	0.682618	0.684	0.537	1.0074e-13	0	PKP3
IL32	4.26575e-18	0.522754	0.89	0.716	1.07454e-13	0	IL32
BCL2L15	4.64381e-18	0.823263	0.476	0.326	1.16978e-13	0	BCL2L15
ETHE1	5.57098e-18	0.596044	0.599	0.455	1.40333e-13	0	ETHE1
ANXA1	5.92266e-18	0.572281	0.732	0.593	1.49192e-13	0	ANXA1
TLR3	7.53079e-18	1.06774	0.355	0.205	1.89701e-13	0	TLR3
TIMP2	7.81157e-18	0.486963	0.534	0.377	1.96773e-13	0	TIMP2
FOXP1	8.84525e-18	0.542552	0.814	0.702	2.22812e-13	0	FOXP1
CTNNB1	1.02733e-17	0.336656	0.825	0.729	2.58785e-13	0	CTNNB1
TGM2	1.08954e-17	0.70723	0.425	0.265	2.74454e-13	0	TGM2
TC2N	1.15075e-17	0.622082	0.657	0.533	2.89875e-13	0	TC2N
SPTLC2	1.29941e-17	0.592777	0.709	0.554	3.27322e-13	0	SPTLC2
PSME1	1.56067e-17	0.39904	0.873	0.784	3.93134e-13	0	PSME1
SLC25A23	1.58159e-17	0.918469	0.518	0.387	3.98402e-13	0	SLC25A23
PLEK2	1.68147e-17	0.801119	0.529	0.376	4.23561e-13	0	PLEK2
CCL20	1.92381e-17	1.05673	0.437	0.277	4.84607e-13	0	CCL20
SUPT4H1	2.00239e-17	0.702884	0.634	0.495	5.04402e-13	0	SUPT4H1
CAPN5	2.16126e-17	1.04427	0.488	0.343	5.44421e-13	0	CAPN5
S100A16	2.3435e-17	0.428509	0.835	0.713	5.90329e-13	0	S100A16
CLCN3	2.45169e-17	0.604253	0.662	0.529	6.1758e-13	0	CLCN3
EHF	2.49567e-17	0.54335	0.726	0.595	6.28659e-13	0	EHF
CHMP2B	2.73648e-17	0.503322	0.719	0.6	6.89318e-13	0	CHMP2B
MSI2	3.26168e-17	0.417935	0.797	0.673	8.21618e-13	0	MSI2
MT-ND4L	4.25735e-17	0.345658	0.941	0.845	1.07243e-12	0	MT-ND4L
PTPRH	4.44891e-17	1.00161	0.292	0.15	1.12068e-12	0	PTPRH
PSCA	5.38098e-17	0.436846	0.512	0.367	1.35547e-12	0	PSCA
FAM120A	6.45794e-17	0.395088	0.857	0.738	1.62675e-12	0	FAM120A
APOL2	6.77286e-17	0.990444	0.439	0.29	1.70608e-12	0	APOL2
BLVRB	7.63475e-17	0.489433	0.779	0.65	1.92319e-12	0	BLVRB
NECTIN4	7.95334e-17	0.794024	0.364	0.216	2.00345e-12	0	NECTIN4
CTNNA1	8.75498e-17	0.449488	0.825	0.724	2.20538e-12	0	CTNNA1
AC098848.1	8.90757e-17	1.38039	0.283	0.148	2.24382e-12	0	AC098848.1
TNIP1	1.00577e-16	0.389107	0.636	0.496	2.53354e-12	0	TNIP1
KCNE3	1.2923e-16	0.727726	0.616	0.479	3.2553e-12	0	KCNE3
LPP	1.64198e-16	0.355023	0.744	0.628	4.13616e-12	0	LPP
KCNK1	1.64976e-16	0.598018	0.657	0.522	4.15574e-12	0	KCNK1
CTSD	1.73182e-16	0.255236	0.838	0.747	4.36245e-12	0	CTSD
MROH6	1.78476e-16	0.847399	0.568	0.413	4.49582e-12	0	MROH6
CD82	1.79652e-16	0.726639	0.641	0.526	4.52542e-12	0	CD82
ECM1	1.8657e-16	1.90192	0.328	0.191	4.69969e-12	0	ECM1
VCL	1.88729e-16	0.557185	0.669	0.555	4.75409e-12	0	VCL
AKAP1	2.06517e-16	0.526896	0.744	0.61	5.20216e-12	0	AKAP1
CASP7	2.22086e-16	0.637408	0.566	0.437	5.59434e-12	0	CASP7
MID1	2.26432e-16	0.763868	0.488	0.333	5.70383e-12	0	MID1
ALDH3B1	2.3429e-16	0.862486	0.435	0.29	5.90177e-12	0	ALDH3B1
TPM4	2.53187e-16	0.451322	0.844	0.732	6.37778e-12	0	TPM4
CASP10	2.58441e-16	0.891434	0.41	0.26	6.51014e-12	0	CASP10
HDAC7	2.84931e-16	0.908083	0.508	0.363	7.17742e-12	0	HDAC7
PKN2	3.04899e-16	0.705794	0.735	0.629	7.68041e-12	0	PKN2
CARD16	3.20387e-16	1.11462	0.338	0.194	8.07054e-12	0	CARD16
BCL10	3.94183e-16	0.504373	0.574	0.438	9.92947e-12	0	BCL10
LPIN1	4.20381e-16	0.904392	0.498	0.362	1.05894e-11	0	LPIN1
ATP10B	4.43531e-16	1.39568	0.285	0.152	1.11725e-11	0	ATP10B
BCL2L1	4.90004e-16	0.534852	0.598	0.476	1.23432e-11	0	BCL2L1
B3GNT3	5.15901e-16	0.820231	0.518	0.38	1.29955e-11	0	B3GNT3
LYN	5.31341e-16	0.50437	0.679	0.537	1.33845e-11	0	LYN
TRIP10	5.61991e-16	0.905329	0.468	0.327	1.41566e-11	0	TRIP10
MYO1E	6.72362e-16	0.649731	0.584	0.461	1.69368e-11	0	MYO1E
AC124319.2	7.90407e-16	1.42036	0.308	0.177	1.99104e-11	0	AC124319.2
INSR	8.62675e-16	0.855123	0.583	0.448	2.17308e-11	0	INSR
SQSTM1	1.08123e-15	0.328333	0.864	0.781	2.72362e-11	0	SQSTM1
CRYZ	1.19538e-15	0.708289	0.496	0.36	3.01117e-11	0	CRYZ
SLC45A4	1.21114e-15	0.980961	0.489	0.356	3.05087e-11	0	SLC45A4
RNF128	1.29012e-15	0.621853	0.525	0.384	3.24982e-11	0	RNF128
PI3	1.68468e-15	0.841543	0.377	0.232	4.2437e-11	0	PI3
SKAP2	1.71751e-15	0.545798	0.636	0.502	4.3264e-11	0	SKAP2
MYRF	1.83637e-15	0.701485	0.571	0.433	4.62581e-11	0	MYRF
NUB1	1.87404e-15	0.496333	0.765	0.656	4.72071e-11	0	NUB1
MYO18A	1.91014e-15	1.05477	0.506	0.364	4.81165e-11	0	MYO18A
SERPINB6	1.92483e-15	0.372099	0.784	0.675	4.84865e-11	0	SERPINB6
LIF	2.28575e-15	1.12051	0.388	0.248	5.75782e-11	0	LIF
PLK2	2.46374e-15	0.792392	0.608	0.473	6.20615e-11	0	PLK2
ERO1A	2.48305e-15	0.590177	0.722	0.622	6.25481e-11	0	ERO1A
BACE2	2.51169e-15	0.436029	0.765	0.648	6.32694e-11	0	BACE2
ASPH	2.54968e-15	0.484832	0.795	0.699	6.42264e-11	0	ASPH
SEMA4G	2.57903e-15	1.08613	0.382	0.249	6.49659e-11	0	SEMA4G
RHBDL2	2.70044e-15	1.00462	0.422	0.287	6.80242e-11	0	RHBDL2
TCF25	2.97835e-15	0.498933	0.795	0.698	7.50245e-11	0	TCF25
KIF13B	3.53869e-15	0.736573	0.535	0.404	8.91396e-11	0	KIF13B
EPS8	4.01539e-15	0.449374	0.739	0.618	1.01148e-10	0	EPS8
BAIAP2L1	4.08406e-15	0.644265	0.6	0.484	1.02877e-10	0	BAIAP2L1
PINK1	4.48071e-15	0.66254	0.429	0.29	1.12869e-10	0	PINK1
PRR15L	5.16467e-15	0.473364	0.594	0.459	1.30098e-10	0	PRR15L
GLUD1	5.3722e-15	0.609135	0.659	0.544	1.35326e-10	0	GLUD1
TNFRSF10B	5.61019e-15	0.790165	0.515	0.379	1.41321e-10	0	TNFRSF10B
INAVA	6.99817e-15	0.567138	0.618	0.5	1.76284e-10	0	INAVA
DSC2	7.01987e-15	0.559143	0.535	0.395	1.7683e-10	0	DSC2
SLK	7.5729e-15	0.447826	0.735	0.617	1.90761e-10	0	SLK
SRRM2	8.09879e-15	0.384161	0.901	0.756	2.04008e-10	0	SRRM2
ALCAM	8.83743e-15	0.607277	0.64	0.52	2.22615e-10	0	ALCAM
PLIN3	9.17804e-15	0.638933	0.554	0.428	2.31195e-10	0	PLIN3
INPP4B	9.54693e-15	0.667607	0.386	0.255	2.40487e-10	0	INPP4B
PML	9.84722e-15	0.758648	0.522	0.384	2.48051e-10	0	PML
ARL6IP5	1.08486e-14	0.372571	0.71	0.623	2.73277e-10	0	ARL6IP5
CAPN8	1.107e-14	0.252209	0.483	0.335	2.78852e-10	0	CAPN8
F3	1.24716e-14	0.954669	0.458	0.312	3.14159e-10	0	F3
EPS8L2	1.42562e-14	0.663423	0.603	0.474	3.59114e-10	0	EPS8L2
P4HA1	1.52585e-14	0.670825	0.566	0.434	3.84361e-10	0	P4HA1
FRYL	1.53893e-14	0.682406	0.592	0.457	3.87656e-10	0	FRYL
GALNT1	1.58793e-14	0.415179	0.702	0.596	4e-10	0	GALNT1
TINAGL1	1.75206e-14	0.643969	0.579	0.439	4.41345e-10	0	TINAGL1
ZC3H12A	1.82746e-14	0.622923	0.608	0.495	4.60336e-10	0	ZC3H12A
CARMIL1	1.84242e-14	0.715631	0.614	0.494	4.64106e-10	0	CARMIL1
OAS1	2.53627e-14	0.964873	0.376	0.242	6.38888e-10	0	OAS1
EFNB1	2.7662e-14	0.531991	0.609	0.483	6.96807e-10	0	EFNB1
TRIM8	3.32511e-14	0.420618	0.576	0.457	8.37595e-10	0	TRIM8
PPP1R13L	3.42829e-14	1.192	0.357	0.232	8.63586e-10	0	PPP1R13L
SGMS2	3.46327e-14	0.670994	0.578	0.456	8.72397e-10	0	SGMS2
DNAJC12	3.59329e-14	0.938474	0.44	0.313	9.0515e-10	0	DNAJC12
OAS2	3.68472e-14	0.91439	0.416	0.286	9.2818e-10	0	OAS2
RNASET2	3.85075e-14	0.643877	0.64	0.528	9.70003e-10	0	RNASET2
RHPN2	3.96507e-14	0.461204	0.58	0.45	9.98801e-10	0	RHPN2
ERGIC1	4.20725e-14	0.383348	0.664	0.547	1.05981e-09	0	ERGIC1
RNF43	4.45796e-14	0.745532	0.607	0.469	1.12296e-09	0	RNF43
SYNGR2	5.17901e-14	0.335818	0.801	0.693	1.30459e-09	0	SYNGR2
TSPO	5.30165e-14	0.297361	0.826	0.752	1.33549e-09	0	TSPO
TRIB1	5.32437e-14	0.566298	0.632	0.51	1.34121e-09	0	TRIB1
RAPGEFL1	5.67888e-14	0.863222	0.404	0.273	1.43051e-09	0	RAPGEFL1
GSN	6.01271e-14	0.268485	0.57	0.429	1.5146e-09	0	GSN
INPP1	6.46852e-14	0.74709	0.485	0.35	1.62942e-09	0	INPP1
GEM	7.96876e-14	0.985979	0.372	0.239	2.00733e-09	0	GEM
KLF3	8.08947e-14	0.490894	0.713	0.592	2.03774e-09	0	KLF3
TNFSF10	8.29821e-14	0.447042	0.631	0.522	2.09032e-09	0	TNFSF10
AHR	8.3524e-14	0.505289	0.662	0.542	2.10397e-09	0	AHR
INF2	8.50826e-14	0.438431	0.696	0.56	2.14323e-09	0	INF2
ID1	8.53137e-14	0.378954	0.667	0.523	2.14905e-09	0	ID1
CD47	1.1278e-13	0.434587	0.735	0.647	2.84092e-09	0	CD47
ANKRD36C	1.1919e-13	0.645516	0.53	0.402	3.00239e-09	0	ANKRD36C
ABTB1	1.26415e-13	1.12537	0.33	0.206	3.18439e-09	0	ABTB1
HOXB3	1.32056e-13	0.837484	0.401	0.277	3.3265e-09	0	HOXB3
GMDS	1.33899e-13	0.581439	0.67	0.538	3.37291e-09	0	GMDS
AC245297.3	1.34314e-13	0.531762	0.548	0.412	3.38338e-09	0	AC245297.3
VILL	1.48106e-13	0.724661	0.463	0.329	3.7308e-09	0	VILL
MT-ND3	1.6418e-13	0.257921	0.974	0.916	4.13569e-09	0	MT-ND3
PYCARD	1.7346e-13	0.637375	0.549	0.435	4.36946e-09	0	PYCARD
SH3D19	1.77249e-13	0.519767	0.507	0.367	4.4649e-09	0	SH3D19
RAB25	2.35865e-13	0.469161	0.642	0.54	5.94144e-09	0	RAB25
LGALS9	2.47046e-13	0.465819	0.664	0.532	6.22308e-09	0	LGALS9
SLC6A8	2.64492e-13	0.693852	0.395	0.27	6.66254e-09	0	SLC6A8
GCNT3	2.81705e-13	0.450435	0.595	0.455	7.09616e-09	0	GCNT3
PRSS8	3.00196e-13	0.331622	0.662	0.535	7.56193e-09	0	PRSS8
TMEM120B	3.1567e-13	0.863903	0.366	0.24	7.95172e-09	0	TMEM120B
SP100	3.1649e-13	0.415007	0.682	0.579	7.97238e-09	0	SP100
CAPN2	3.23029e-13	0.480381	0.712	0.636	8.1371e-09	0	CAPN2
GSDMD	3.25145e-13	0.557099	0.707	0.583	8.19039e-09	0	GSDMD
ZNHIT1	3.47615e-13	0.399706	0.765	0.677	8.75642e-09	0	ZNHIT1
CSNK1A1	3.65717e-13	0.300558	0.85	0.758	9.2124e-09	0	CSNK1A1
PLBD1	3.71241e-13	0.665032	0.438	0.308	9.35157e-09	0	PLBD1
RARS	3.87806e-13	0.534196	0.63	0.515	9.76884e-09	0	RARS
FGD6	4.2529e-13	0.778079	0.46	0.33	1.07131e-08	0	FGD6
RABGAP1L	4.27691e-13	0.588152	0.608	0.502	1.07735e-08	0	RABGAP1L
DYNC1I2	4.32994e-13	0.344278	0.83	0.739	1.09071e-08	0	DYNC1I2
IFI6	4.65432e-13	0.452443	0.66	0.536	1.17242e-08	0	IFI6
MET	4.77475e-13	0.645899	0.561	0.433	1.20276e-08	0	MET
TRIM16	4.78185e-13	0.712673	0.418	0.282	1.20455e-08	0	TRIM16
CHMP2A	5.52225e-13	0.460694	0.709	0.621	1.39106e-08	0	CHMP2A
SEPT9	5.57681e-13	0.373318	0.649	0.529	1.4048e-08	0	SEPT9
SORD	5.66362e-13	0.647692	0.57	0.468	1.42667e-08	0	SORD
IFITM3	5.68204e-13	0.28048	0.86	0.743	1.43131e-08	0	IFITM3
PARP9	5.68345e-13	0.575669	0.629	0.5	1.43166e-08	0	PARP9
PTTG1IP	5.702e-13	0.460909	0.746	0.647	1.43633e-08	0	PTTG1IP
PPP1R12B	7.22517e-13	0.777597	0.504	0.385	1.82002e-08	0	PPP1R12B
ST5	8.36299e-13	0.462236	0.47	0.349	2.10664e-08	0	ST5
IDH1	8.49304e-13	0.420352	0.731	0.616	2.1394e-08	0	IDH1
PTPN12	8.55545e-13	0.571148	0.676	0.557	2.15512e-08	0	PTPN12
TFG	8.6075e-13	0.405553	0.652	0.534	2.16823e-08	0	TFG
C4orf3	9.04326e-13	0.418562	0.657	0.569	2.278e-08	0	C4orf3
MSLN	9.40003e-13	0.629335	0.548	0.42	2.36787e-08	0	MSLN
FLII	9.86664e-13	0.560394	0.618	0.5	2.48541e-08	0	FLII
ABCC3	1.03859e-12	0.480375	0.601	0.475	2.6162e-08	0	ABCC3
SPAG1	1.04972e-12	0.812986	0.506	0.4	2.64426e-08	0	SPAG1
CDC42BPB	1.10658e-12	0.536822	0.631	0.516	2.78747e-08	0	CDC42BPB
OPTN	1.25966e-12	0.268524	0.668	0.55	3.17308e-08	0	OPTN
TMEM106B	1.28441e-12	0.835865	0.567	0.475	3.23542e-08	0	TMEM106B
MLXIP	1.51386e-12	0.662841	0.623	0.521	3.81342e-08	0	MLXIP
RHOC	1.62027e-12	0.330739	0.695	0.581	4.08145e-08	0	RHOC
PALLD	1.65836e-12	0.624758	0.537	0.418	4.1774e-08	0	PALLD
RNF141	1.69681e-12	0.558334	0.455	0.335	4.27426e-08	0	RNF141
AMOTL2	1.69939e-12	0.756993	0.382	0.256	4.28076e-08	0	AMOTL2
PELI1	1.72164e-12	0.432669	0.568	0.441	4.3368e-08	0	PELI1
LLGL2	2.11693e-12	0.356587	0.738	0.633	5.33255e-08	0	LLGL2
DPY19L1	2.40306e-12	0.706382	0.496	0.378	6.05331e-08	0	DPY19L1
CANT1	2.47035e-12	0.451276	0.692	0.567	6.22281e-08	0	CANT1
BRD9	2.56947e-12	0.675156	0.664	0.547	6.47251e-08	0	BRD9
GOLGA2	2.70827e-12	0.376121	0.686	0.577	6.82212e-08	0	GOLGA2
FBXW11	2.92426e-12	0.630707	0.561	0.448	7.36621e-08	0	FBXW11
ISG20	3.19606e-12	0.486694	0.501	0.385	8.05086e-08	0	ISG20
JAG1	3.2783e-12	0.649145	0.623	0.509	8.25803e-08	0	JAG1
TPMT	3.51542e-12	0.507015	0.58	0.473	8.85533e-08	0	TPMT
MLKL	3.70093e-12	1.17715	0.337	0.216	9.32263e-08	0	MLKL
STX7	3.79506e-12	0.397425	0.562	0.456	9.55975e-08	0	STX7
PPTC7	4.4206e-12	0.526253	0.533	0.423	1.11355e-07	0	PPTC7
TMEM125	4.5288e-12	0.672359	0.366	0.253	1.1408e-07	0	TMEM125
DDX60	4.72891e-12	0.607171	0.446	0.321	1.19121e-07	0	DDX60
VPS37B	5.03767e-12	0.495794	0.624	0.505	1.26899e-07	0	VPS37B
FA2H	5.26937e-12	0.617673	0.405	0.287	1.32735e-07	0	FA2H
HSD17B2	5.31875e-12	0.781944	0.362	0.242	1.33979e-07	0	HSD17B2
AAMP	6.01712e-12	0.427417	0.728	0.619	1.51571e-07	0	AAMP
PARP8	7.71236e-12	0.764001	0.42	0.3	1.94274e-07	0	PARP8
SORBS2	7.73579e-12	0.561403	0.492	0.386	1.94865e-07	0	SORBS2
ABHD17C	7.75525e-12	0.400502	0.666	0.557	1.95355e-07	0	ABHD17C
GUK1	8.20751e-12	0.268211	0.856	0.764	2.06747e-07	0	GUK1
CDH1	8.52968e-12	0.281342	0.765	0.67	2.14863e-07	0	CDH1
PERP	8.60869e-12	0.256667	0.814	0.758	2.16853e-07	0	PERP
TNFRSF10A	8.68611e-12	0.803785	0.437	0.322	2.18803e-07	0	TNFRSF10A
EPS8L3	8.78268e-12	0.749273	0.543	0.424	2.21236e-07	0	EPS8L3
NEBL	9.40018e-12	0.92992	0.423	0.306	2.3679e-07	0	NEBL
ASAH1	1.01702e-11	0.263517	0.636	0.527	2.56188e-07	0	ASAH1
BLCAP	1.02008e-11	0.538888	0.515	0.403	2.56959e-07	0	BLCAP
LDHA	1.03191e-11	0.299672	0.875	0.767	2.59937e-07	0	LDHA
FNDC3A	1.14526e-11	0.276934	0.564	0.45	2.88492e-07	0	FNDC3A
EML2	1.23209e-11	0.691674	0.494	0.373	3.10363e-07	0	EML2
EXOC1	1.26693e-11	0.440461	0.545	0.423	3.1914e-07	0	EXOC1
FDFT1	1.2719e-11	0.52723	0.677	0.573	3.20391e-07	0	FDFT1
RPS19	1.2738e-11	0.25594	0.974	0.935	3.20869e-07	0	RPS19
ADGRE5	1.43185e-11	0.490056	0.588	0.454	3.60683e-07	0	ADGRE5
QSOX1	1.45146e-11	0.432052	0.649	0.54	3.65622e-07	0	QSOX1
CDC37	1.46368e-11	0.400016	0.752	0.609	3.68701e-07	0	CDC37
IBTK	1.49375e-11	0.37222	0.688	0.585	3.76276e-07	0	IBTK
CFLAR	1.52371e-11	0.256502	0.704	0.612	3.83822e-07	0	CFLAR
FHL2	1.53119e-11	0.628296	0.526	0.408	3.85707e-07	0	FHL2
JPT1	1.59702e-11	0.318801	0.834	0.73	4.02289e-07	0	JPT1
FSTL3	1.64394e-11	0.497658	0.356	0.237	4.14107e-07	0	FSTL3
BAIAP2L2	1.70789e-11	0.735207	0.471	0.358	4.30216e-07	0	BAIAP2L2
KIAA1551	1.71996e-11	0.446712	0.62	0.522	4.33257e-07	0	KIAA1551
PTK6	1.86441e-11	0.512905	0.421	0.304	4.69644e-07	0	PTK6
CDC42EP2	1.87488e-11	0.77488	0.329	0.212	4.72281e-07	0	CDC42EP2
SLC28A3	1.93974e-11	0.864641	0.313	0.193	4.88621e-07	0	SLC28A3
TK2	2.1212e-11	0.622497	0.434	0.317	5.34329e-07	0	TK2
PODXL	2.16075e-11	0.589279	0.543	0.416	5.44294e-07	0	PODXL
STAT3	2.31829e-11	0.314337	0.755	0.672	5.83978e-07	0	STAT3
MTMR11	2.48046e-11	0.793533	0.334	0.219	6.24827e-07	0	MTMR11
PDCD6IP	2.56857e-11	0.327186	0.723	0.637	6.47024e-07	0	PDCD6IP
MYO1C	2.78845e-11	0.394352	0.701	0.593	7.02411e-07	0	MYO1C
NME7	2.8013e-11	0.746418	0.462	0.359	7.05647e-07	0	NME7
SLC39A14	2.88662e-11	0.557522	0.608	0.51	7.27138e-07	0	SLC39A14
HLA-DPB1	2.89396e-11	0.364743	0.657	0.543	7.28987e-07	0	HLA-DPB1
PRKD2	3.0491e-11	0.841713	0.355	0.233	7.68069e-07	0	PRKD2
LINC01133	3.07817e-11	0.534673	0.527	0.401	7.7539e-07	0	LINC01133
FAM129B	3.31392e-11	0.549936	0.599	0.491	8.34777e-07	0	FAM129B
GLG1	3.344e-11	0.391515	0.69	0.603	8.42352e-07	0	GLG1
SOX9	3.62637e-11	0.41025	0.768	0.669	9.13482e-07	0	SOX9
IMPA1	4.16113e-11	0.91092	0.39	0.276	1.04819e-06	0	IMPA1
CTTN	4.53988e-11	0.306182	0.754	0.656	1.1436e-06	0	CTTN
COL1A2	4.75561e-11	1.59826	0.317	0.205	1.19794e-06	0	COL1A2
NLRC5	4.77285e-11	0.769435	0.532	0.408	1.20228e-06	0	NLRC5
MPG	4.86511e-11	0.471887	0.436	0.326	1.22552e-06	0	MPG
GPBP1L1	4.883e-11	0.498205	0.606	0.498	1.23003e-06	0	GPBP1L1
IFIT3	4.95658e-11	0.793423	0.382	0.258	1.24856e-06	0	IFIT3
MYEOV	5.86037e-11	0.989647	0.332	0.222	1.47623e-06	0	MYEOV
PAWR	6.00244e-11	0.385318	0.704	0.605	1.51201e-06	0	PAWR
AFAP1-AS1	6.35903e-11	0.569378	0.599	0.469	1.60184e-06	0	AFAP1-AS1
ALS2CL	6.4119e-11	1.1625	0.25	0.147	1.61516e-06	0	ALS2CL
SERINC2	6.54313e-11	0.472377	0.586	0.487	1.64821e-06	0	SERINC2
JAK2	6.84998e-11	0.662604	0.509	0.406	1.72551e-06	0	JAK2
RREB1	7.13126e-11	0.664012	0.577	0.479	1.79636e-06	0	RREB1
IRF2	7.30322e-11	0.50724	0.532	0.426	1.83968e-06	0	IRF2
EXT1	7.62151e-11	0.703118	0.499	0.389	1.91986e-06	0	EXT1
NDRG1	7.68681e-11	0.489631	0.589	0.461	1.93631e-06	0	NDRG1
FUT3	7.83018e-11	0.646065	0.428	0.312	1.97242e-06	0	FUT3
STEAP2	8.01029e-11	0.818787	0.365	0.254	2.01779e-06	0	STEAP2
C3	8.38768e-11	0.96802	0.395	0.28	2.11286e-06	0	C3
STX18	8.4778e-11	0.697923	0.449	0.34	2.13556e-06	0	STX18
HK2	8.64921e-11	0.604777	0.457	0.342	2.17874e-06	0	HK2
RALGDS	8.65536e-11	0.716248	0.495	0.387	2.18029e-06	0	RALGDS
DPP4	8.7463e-11	0.48646	0.356	0.238	2.20319e-06	0	DPP4
SLC2A13	9.05698e-11	0.99489	0.338	0.232	2.28145e-06	0	SLC2A13
DPYD	9.86053e-11	1.0166	0.358	0.241	2.48387e-06	0	DPYD
ORMDL2	9.98861e-11	0.524225	0.459	0.344	2.51613e-06	0	ORMDL2
ARHGAP26	1.1137e-10	0.641921	0.477	0.361	2.8054e-06	0	ARHGAP26
BBC3	1.17207e-10	0.515132	0.455	0.329	2.95243e-06	0	BBC3
ZDHHC3	1.21045e-10	0.495804	0.588	0.496	3.04912e-06	0	ZDHHC3
CDC42EP1	1.21315e-10	0.319408	0.718	0.604	3.05593e-06	0	CDC42EP1
MICALL2	1.21703e-10	0.641024	0.571	0.468	3.06571e-06	0	MICALL2
FAM83H	1.24486e-10	0.508767	0.628	0.526	3.13579e-06	0	FAM83H
APOL3	1.26778e-10	0.628456	0.474	0.357	3.19355e-06	0	APOL3
RALGPS2	1.30316e-10	0.562933	0.413	0.301	3.28265e-06	0	RALGPS2
RNF44	1.32404e-10	0.613163	0.459	0.356	3.33527e-06	0	RNF44
PLEKHA7	1.32832e-10	0.930865	0.401	0.298	3.34605e-06	0	PLEKHA7
RHBDF1	1.34458e-10	0.900122	0.29	0.184	3.387e-06	0	RHBDF1
FAM126B	1.38243e-10	0.486568	0.456	0.342	3.48235e-06	0	FAM126B
CD68	1.47278e-10	0.750334	0.283	0.175	3.70994e-06	0	CD68
SMAD3	1.557e-10	0.554455	0.483	0.379	3.92208e-06	0	SMAD3
MAT2B	1.65504e-10	0.334096	0.638	0.541	4.16905e-06	0	MAT2B
PPIC	1.70772e-10	0.307316	0.47	0.35	4.30176e-06	0	PPIC
RALA	1.82208e-10	0.424784	0.667	0.582	4.58982e-06	0	RALA
MAFF	2.05856e-10	0.420912	0.591	0.484	5.18551e-06	0	MAFF
FAM13A	2.25021e-10	0.699135	0.433	0.318	5.66828e-06	0	FAM13A
USP53	2.38173e-10	0.374457	0.602	0.485	5.99957e-06	0	USP53
CAPN1	2.40933e-10	0.388183	0.638	0.534	6.06911e-06	0	CAPN1
SMCR5	2.82704e-10	0.870024	0.281	0.171	7.12131e-06	0	SMCR5
TNFSF9	2.90843e-10	0.67851	0.418	0.306	7.32635e-06	0	TNFSF9
AGRN	3.07768e-10	0.456417	0.585	0.466	7.75268e-06	0	AGRN
TMEM30A	3.09563e-10	0.391867	0.616	0.526	7.7979e-06	0	TMEM30A
TRIM15	3.14218e-10	0.479317	0.353	0.238	7.91514e-06	0	TRIM15
PTBP3	3.4131e-10	0.257691	0.865	0.767	8.59761e-06	0	PTBP3
PARP3	3.69082e-10	0.892906	0.269	0.168	9.29716e-06	0	PARP3
HLA-DMA	3.7519e-10	0.408629	0.652	0.528	9.45103e-06	0	HLA-DMA
RBM47	3.79323e-10	0.339309	0.784	0.705	9.55514e-06	0	RBM47
C4BPB	4.03342e-10	0.686856	0.359	0.249	1.01602e-05	0	C4BPB
ALKBH7	4.08595e-10	0.495478	0.583	0.49	1.02925e-05	0	ALKBH7
APP	4.21895e-10	0.272879	0.8	0.703	1.06275e-05	0	APP
ANTXR2	4.3208e-10	0.773903	0.343	0.231	1.08841e-05	0	ANTXR2
DSP	4.37606e-10	0.277669	0.856	0.772	1.10233e-05	0	DSP
STS	4.52589e-10	1.0048	0.311	0.211	1.14007e-05	0	STS
RIPK2	4.54555e-10	0.532789	0.461	0.348	1.14502e-05	0	RIPK2
TNFRSF14	4.95548e-10	0.582121	0.54	0.442	1.24829e-05	0	TNFRSF14
COL3A1	5.07048e-10	1.48445	0.36	0.25	1.27725e-05	0	COL3A1
ACBD5	5.268e-10	0.41346	0.658	0.567	1.32701e-05	0	ACBD5
PPP1R15A	5.61928e-10	0.425154	0.817	0.738	1.4155e-05	0	PPP1R15A
SRD5A3	5.64302e-10	0.764872	0.361	0.258	1.42148e-05	0	SRD5A3
ZMYM2	5.69738e-10	0.381713	0.569	0.461	1.43517e-05	0	ZMYM2
TNKS1BP1	6.23386e-10	0.47324	0.433	0.322	1.57031e-05	0	TNKS1BP1
USP9X	6.35653e-10	0.274017	0.734	0.664	1.60121e-05	0	USP9X
RPS27L	6.6133e-10	0.285034	0.842	0.805	1.66589e-05	0	RPS27L
RHBDF2	6.66452e-10	0.727646	0.413	0.303	1.67879e-05	0	RHBDF2
UBE2L6	8.16848e-10	0.425076	0.588	0.474	2.05764e-05	0	UBE2L6
DIP2A	8.28294e-10	0.728116	0.522	0.427	2.08647e-05	0	DIP2A
ST6GALNAC1	9.32609e-10	0.587244	0.472	0.359	2.34924e-05	0	ST6GALNAC1
GAN	9.56461e-10	0.636819	0.41	0.302	2.40933e-05	0	GAN
DAPK1	9.74449e-10	0.478954	0.427	0.318	2.45464e-05	0	DAPK1
TMEM165	9.81689e-10	0.343261	0.612	0.503	2.47287e-05	0	TMEM165
SP140L	1.07658e-09	0.577829	0.356	0.25	2.7119e-05	0	SP140L
DNMBP	1.11057e-09	0.462098	0.498	0.391	2.79754e-05	0	DNMBP
LONP2	1.13767e-09	0.546912	0.573	0.482	2.86579e-05	0	LONP2
PON2	1.19051e-09	0.417912	0.538	0.445	2.99889e-05	0	PON2
MECOM	1.19233e-09	0.306766	0.624	0.517	3.00347e-05	0	MECOM
MIR222HG	1.27625e-09	0.896532	0.36	0.253	3.21489e-05	0	MIR222HG
RCOR1	1.31838e-09	0.636345	0.546	0.464	3.321e-05	0	RCOR1
SP110	1.45079e-09	0.623067	0.401	0.298	3.65453e-05	0	SP110
GPR35	1.50386e-09	0.901562	0.349	0.251	3.78821e-05	0	GPR35
POC1B	1.56499e-09	0.544526	0.395	0.294	3.94222e-05	0	POC1B
TSTA3	1.60079e-09	0.365809	0.778	0.671	4.03238e-05	0	TSTA3
ABCD4	1.64397e-09	0.650729	0.337	0.232	4.14117e-05	0	ABCD4
FAM221A	1.8879e-09	0.734997	0.462	0.37	4.75562e-05	0	FAM221A
SLC35D2	1.93721e-09	0.671286	0.338	0.233	4.87984e-05	0	SLC35D2
VSIR	1.95035e-09	0.720601	0.256	0.155	4.91294e-05	0	VSIR
XRN1	2.07692e-09	0.368738	0.577	0.494	5.23176e-05	0	XRN1
COL1A1	2.16576e-09	1.31428	0.364	0.264	5.45556e-05	0	COL1A1
CLYBL	2.29815e-09	0.837921	0.31	0.209	5.78904e-05	0	CLYBL
SCD	2.43524e-09	0.903623	0.515	0.43	6.13438e-05	0	SCD
NFKBIA	2.52265e-09	0.386171	0.761	0.702	6.35456e-05	0	NFKBIA
NAPG	2.74056e-09	0.346643	0.533	0.449	6.90347e-05	0	NAPG
SLC2A1	2.74988e-09	0.407167	0.443	0.339	6.92695e-05	0	SLC2A1
SEMA4B	2.84388e-09	0.419811	0.5	0.404	7.16374e-05	0	SEMA4B
TMEM179B	2.92689e-09	0.359372	0.496	0.406	7.37283e-05	0	TMEM179B
IL18	2.96322e-09	0.614001	0.438	0.329	7.46436e-05	0	IL18
TMEM87B	2.96661e-09	0.606332	0.53	0.443	7.4729e-05	0	TMEM87B
UFM1	3.52868e-09	0.348982	0.688	0.608	8.88875e-05	0	UFM1
SLMAP	3.92865e-09	0.408378	0.612	0.524	9.89627e-05	0	SLMAP
ELK3	4.32545e-09	0.695699	0.34	0.235	0.000108958	0	ELK3
HMGCS1	4.41763e-09	0.619983	0.673	0.591	0.00011128	0	HMGCS1
B4GALNT3	4.45955e-09	0.271818	0.318	0.212	0.000112336	0	B4GALNT3
RABAC1	4.49545e-09	0.330874	0.632	0.545	0.00011324	0	RABAC1
BMPR2	4.56056e-09	0.703167	0.479	0.384	0.000114881	0	BMPR2
MYH9	4.74546e-09	0.325308	0.822	0.722	0.000119538	0	MYH9
TRAF4	5.23937e-09	0.393655	0.532	0.444	0.00013198	0	TRAF4
EPSTI1	5.43127e-09	0.597291	0.529	0.422	0.000136814	0	EPSTI1
CORO1B	5.49009e-09	0.362374	0.56	0.469	0.000138295	0	CORO1B
PRPF4B	5.76967e-09	0.462374	0.78	0.699	0.000145338	0	PRPF4B
ADAM10	5.97321e-09	0.316699	0.675	0.597	0.000150465	0	ADAM10
MPRIP	6.05062e-09	0.548471	0.587	0.493	0.000152415	0	MPRIP
VPS28	6.06453e-09	0.28877	0.676	0.606	0.000152766	0	VPS28
PMP22	6.31621e-09	1.18666	0.288	0.196	0.000159105	0	PMP22
RIOK3	6.3691e-09	0.276449	0.679	0.589	0.000160438	0	RIOK3
RNF149	6.63613e-09	0.254059	0.585	0.489	0.000167164	0	RNF149
ZFAND3	7.32116e-09	0.431644	0.44	0.34	0.00018442	0	ZFAND3
CRIM1	7.34468e-09	0.527159	0.474	0.371	0.000185012	0	CRIM1
CASP1	7.74727e-09	0.887509	0.351	0.255	0.000195154	0	CASP1
SMIM14	7.8516e-09	0.280505	0.631	0.541	0.000197782	0	SMIM14
TANC1	8.88121e-09	0.813133	0.386	0.286	0.000223718	0	TANC1
AIM2	9.07714e-09	0.833867	0.295	0.196	0.000228653	0	AIM2
BAK1	9.37108e-09	0.537558	0.46	0.359	0.000236057	0	BAK1
PRKAA1	9.50393e-09	0.564347	0.489	0.402	0.000239404	0	PRKAA1
NECTIN2	9.50565e-09	0.368372	0.607	0.513	0.000239447	0	NECTIN2
FRK	9.63643e-09	0.383447	0.425	0.328	0.000242742	0	FRK
CTTNBP2NL	1.01262e-08	0.754239	0.373	0.275	0.00025508	0	CTTNBP2NL
VDAC2	1.03528e-08	0.277895	0.731	0.654	0.000260787	0	VDAC2
R3HDM4	1.03696e-08	0.370125	0.554	0.464	0.000261209	0	R3HDM4
SCAF11	1.13871e-08	0.274645	0.825	0.726	0.000286842	0	SCAF11
MIER1	1.16262e-08	0.435691	0.641	0.559	0.000292864	0	MIER1
GLRX	1.17835e-08	0.413588	0.289	0.192	0.000296827	0	GLRX
PSMB10	1.36383e-08	0.596537	0.36	0.263	0.000343548	0	PSMB10
ST14	1.4174e-08	0.332902	0.631	0.542	0.000357043	0	ST14
AKAP9	1.41925e-08	0.26255	0.874	0.767	0.000357508	0	AKAP9
DNAJB2	1.44594e-08	0.84778	0.389	0.3	0.000364232	0	DNAJB2
PPP3CA	1.45074e-08	0.308504	0.676	0.589	0.000365442	0	PPP3CA
SPDEF	1.45522e-08	0.517521	0.452	0.351	0.00036657	0	SPDEF
SLC1A1	1.45968e-08	0.671418	0.387	0.288	0.000367694	0	SLC1A1
PANK3	1.46356e-08	0.451743	0.58	0.486	0.00036867	0	PANK3
ARHGAP6	1.46565e-08	0.924358	0.323	0.224	0.000369198	0	ARHGAP6
SPEN	1.47489e-08	0.351291	0.73	0.628	0.000371525	0	SPEN
PRRC1	1.4977e-08	0.378388	0.532	0.443	0.00037727	0	PRRC1
SAMD9L	1.58278e-08	0.841685	0.304	0.205	0.000398702	0	SAMD9L
KIAA1522	1.58944e-08	0.30578	0.607	0.513	0.00040038	0	KIAA1522
RNPEPL1	1.61128e-08	0.719577	0.512	0.426	0.000405882	0	RNPEPL1
ADGRG6	1.61564e-08	0.306068	0.332	0.229	0.000406979	0	ADGRG6
STAT6	1.81288e-08	0.410705	0.568	0.48	0.000456664	0	STAT6
SFXN3	1.85358e-08	0.692365	0.301	0.201	0.000466917	0	SFXN3
LMO4	1.89191e-08	0.490656	0.689	0.602	0.000476573	0	LMO4
CBLB	1.91024e-08	0.465828	0.35	0.246	0.00048119	0	CBLB
CHPF	2.19921e-08	0.650961	0.469	0.382	0.000553981	0	CHPF
PRKCI	2.49009e-08	0.370345	0.68	0.582	0.000627255	0	PRKCI
GADD45A	2.54131e-08	0.453774	0.59	0.505	0.000640155	0	GADD45A
MYD88	2.58805e-08	0.752964	0.392	0.3	0.00065193	0	MYD88
DDX58	2.6446e-08	0.634002	0.323	0.225	0.000666174	0	DDX58
CCDC107	2.7223e-08	0.705663	0.431	0.341	0.000685748	0	CCDC107
MAX	2.77447e-08	0.431108	0.539	0.447	0.00069889	0	MAX
INPP4A	2.84718e-08	1.0258	0.3	0.211	0.000717206	0	INPP4A
LYST	2.97288e-08	0.288384	0.356	0.256	0.000748868	0	LYST
CDKN1A	2.9761e-08	0.481724	0.596	0.496	0.000749681	0	CDKN1A
GOLGA4	3.1738e-08	0.261731	0.894	0.813	0.00079948	0	GOLGA4
NAPRT	3.22594e-08	0.281113	0.687	0.594	0.000812613	0	NAPRT
MSMO1	3.40046e-08	0.531659	0.449	0.358	0.000856577	0	MSMO1
ADAM8	3.44555e-08	0.480802	0.427	0.319	0.000867933	0	ADAM8
ARAP2	3.6369e-08	0.570103	0.472	0.377	0.000916136	0	ARAP2
ATP6V0A1	3.67102e-08	0.468902	0.388	0.291	0.000924729	0	ATP6V0A1
SMG1	3.73875e-08	0.394357	0.781	0.695	0.00094179	0	SMG1
TMEM43	3.86378e-08	0.476017	0.465	0.37	0.000973286	0	TMEM43
RAMP1	3.93903e-08	0.346975	0.463	0.365	0.000992241	0	RAMP1
KIAA0895	3.99026e-08	0.473217	0.284	0.191	0.00100515	0	KIAA0895
ELMSAN1	4.42377e-08	0.254129	0.537	0.456	0.00111435	0	ELMSAN1
KIAA0040	4.50823e-08	0.508234	0.476	0.373	0.00113562	0	KIAA0040
IFT172	4.51017e-08	0.839684	0.325	0.238	0.00113611	0	IFT172
AGPAT2	4.8636e-08	0.267164	0.588	0.499	0.00122514	0	AGPAT2
MUC20-OT1	5.14133e-08	0.496763	0.592	0.494	0.0012951	0	MUC20-OT1
IST1	5.14491e-08	0.27756	0.624	0.535	0.001296	0	IST1
JMJD1C	5.15796e-08	0.3381	0.673	0.597	0.00129929	0	JMJD1C
DYNC1H1	5.22434e-08	0.332022	0.834	0.726	0.00131601	0	DYNC1H1
COPB1	5.30309e-08	0.285861	0.72	0.638	0.00133585	0	COPB1
GIT2	5.43435e-08	0.88032	0.274	0.187	0.00136891	0	GIT2
LRG1	5.45305e-08	0.609104	0.311	0.219	0.00137362	0	LRG1
DAPP1	5.45514e-08	0.390877	0.278	0.185	0.00137415	0	DAPP1
CD9	6.33658e-08	0.352133	0.715	0.608	0.00159618	0	CD9
MST1R	6.6085e-08	0.685018	0.456	0.355	0.00166468	0	MST1R
SH2D3A	7.19197e-08	0.942844	0.363	0.271	0.00181166	0	SH2D3A
KALRN	7.26721e-08	0.568606	0.454	0.365	0.00183061	0	KALRN
TNFRSF12A	7.50926e-08	0.437044	0.552	0.444	0.00189158	0	TNFRSF12A
PCDH1	7.51449e-08	0.483036	0.407	0.313	0.0018929	0	PCDH1
SPIRE2	7.58364e-08	0.897003	0.376	0.285	0.00191032	0	SPIRE2
EGLN3	7.94142e-08	0.858447	0.329	0.24	0.00200044	0	EGLN3
LAD1	8.11334e-08	0.368218	0.641	0.55	0.00204375	0	LAD1
TAP2	8.35677e-08	0.465441	0.619	0.503	0.00210507	0	TAP2
PPP4R1	8.44232e-08	0.376677	0.511	0.431	0.00212662	0	PPP4R1
PDP1	9.44196e-08	0.345792	0.425	0.331	0.00237843	0	PDP1
PPP1R16A	9.96782e-08	0.318654	0.532	0.446	0.00251089	0	PPP1R16A
STK39	1.00893e-07	0.339268	0.59	0.505	0.0025415	0	STK39
MARVELD3	1.1171e-07	0.613587	0.383	0.293	0.00281397	0	MARVELD3
CRB3	1.129e-07	0.686782	0.399	0.32	0.00284395	0	CRB3
NRIP1	1.14985e-07	0.378494	0.524	0.433	0.00289648	0	NRIP1
MPP5	1.17302e-07	0.685429	0.416	0.329	0.00295483	0	MPP5
SLC9A3R2	1.19354e-07	0.572548	0.41	0.327	0.00300652	0	SLC9A3R2
BICDL2	1.21098e-07	0.862976	0.381	0.289	0.00305045	0	BICDL2
TM9SF2	1.21977e-07	0.289074	0.722	0.643	0.00307259	0	TM9SF2
KLK7	1.22213e-07	0.984387	0.342	0.252	0.00307854	0	KLK7
SUN1	1.2671e-07	0.369227	0.588	0.502	0.00319182	0	SUN1
AMN	1.53949e-07	0.617191	0.32	0.229	0.00387798	0	AMN
CREB3L1	1.61287e-07	0.482169	0.534	0.458	0.00406281	0	CREB3L1
UBA7	1.61774e-07	0.69882	0.3	0.214	0.00407509	0	UBA7
GIGYF2	1.62243e-07	0.50492	0.59	0.496	0.00408691	0	GIGYF2
PIK3C2B	1.6496e-07	0.476903	0.283	0.193	0.00415535	0	PIK3C2B
GALNT3	1.67235e-07	0.26125	0.752	0.671	0.00421264	0	GALNT3
N4BP1	1.6928e-07	0.495039	0.45	0.352	0.00426415	0	N4BP1
ARFIP1	1.70089e-07	0.520653	0.442	0.353	0.00428455	0	ARFIP1
FAM102A	1.75268e-07	0.378832	0.528	0.436	0.00441499	0	FAM102A
PPP2R2A	1.77725e-07	0.369515	0.623	0.532	0.0044769	0	PPP2R2A
UNC93B1	1.98219e-07	0.59911	0.416	0.323	0.00499313	0	UNC93B1
HNF4G	1.98311e-07	0.616249	0.384	0.294	0.00499544	0	HNF4G
SH2D4A	1.9914e-07	0.501326	0.512	0.425	0.00501635	0	SH2D4A
ELOVL1	2.12122e-07	0.462489	0.506	0.413	0.00534336	0	ELOVL1
DAP	2.13974e-07	0.336572	0.626	0.553	0.00539001	0	DAP
RUNX1	2.28249e-07	0.459674	0.584	0.497	0.00574958	0	RUNX1
SEC24A	2.31871e-07	0.498002	0.427	0.348	0.00584083	0	SEC24A
PARP10	2.41837e-07	0.829602	0.326	0.243	0.00609186	0	PARP10
TMPRSS3	2.46324e-07	0.541433	0.35	0.261	0.00620491	0	TMPRSS3
PXN	2.49522e-07	0.417747	0.467	0.378	0.00628546	0	PXN
VEGFA	2.64284e-07	0.352802	0.755	0.66	0.0066573	0	VEGFA
WWC1	2.65807e-07	0.426818	0.386	0.299	0.00669567	0	WWC1
TNFRSF21	2.66793e-07	0.376079	0.482	0.391	0.00672052	0	TNFRSF21
TSPAN13	2.76136e-07	0.337007	0.619	0.534	0.00695587	0	TSPAN13
ESYT2	2.78176e-07	0.512728	0.515	0.421	0.00700726	0	ESYT2
FCHO2	2.8082e-07	0.503726	0.443	0.352	0.00707385	0	FCHO2
KITLG	2.94887e-07	0.410178	0.532	0.449	0.00742821	0	KITLG
TMED7	3.00064e-07	0.32129	0.601	0.515	0.00755862	0	TMED7
AHI1	3.16818e-07	0.636863	0.612	0.533	0.00798064	0	AHI1
WARS	3.25477e-07	0.729214	0.567	0.476	0.00819877	0	WARS
SCAMP1	3.33345e-07	0.656897	0.523	0.441	0.00839697	0	SCAMP1
PPFIBP1	3.41869e-07	0.448231	0.463	0.376	0.00861167	0	PPFIBP1
PROM1	3.55853e-07	0.498552	0.515	0.438	0.00896395	0	PROM1
PLEKHS1	3.59121e-07	0.459199	0.433	0.341	0.00904627	0	PLEKHS1
BRWD1	3.69523e-07	0.477345	0.579	0.498	0.00930827	0	BRWD1
ATP11A	3.75773e-07	0.36023	0.515	0.426	0.00946573	0	ATP11A
BAZ2A	3.77548e-07	0.350656	0.557	0.48	0.00951043	0	BAZ2A
NKTR	3.8435e-07	0.277325	0.707	0.61	0.00968179	0	NKTR
PEX26	4.09288e-07	0.557528	0.483	0.406	0.01031	0	PEX26
HDHD3	4.13101e-07	0.399432	0.45	0.373	0.010406	0	HDHD3
SQOR	4.19719e-07	0.303075	0.512	0.431	0.0105727	0	SQOR
CTSB	4.23602e-07	0.314837	0.669	0.612	0.0106705	0	CTSB
NOXO1	4.70326e-07	0.861072	0.278	0.196	0.0118475	0	NOXO1
HELZ2	4.93204e-07	0.724491	0.404	0.315	0.0124238	0	HELZ2
CNKSR1	4.93403e-07	0.959821	0.285	0.205	0.0124288	0	CNKSR1
SAA1	5.0779e-07	0.434142	0.28	0.192	0.0127912	0	SAA1
CAMK2G	5.22412e-07	0.458856	0.439	0.35	0.0131595	0	CAMK2G
EDEM1	5.22612e-07	0.434612	0.436	0.347	0.0131646	0	EDEM1
ACADVL	5.60746e-07	0.398599	0.712	0.639	0.0141252	0	ACADVL
WDR44	5.88719e-07	0.759629	0.292	0.211	0.0148298	0	WDR44
SH3KBP1	5.99049e-07	0.255	0.611	0.525	0.01509	0	SH3KBP1
C1orf21	5.99807e-07	0.529368	0.377	0.293	0.0151091	0	C1orf21
MICU1	6.01181e-07	0.525848	0.503	0.415	0.0151437	0	MICU1
WIPF2	6.0122e-07	0.30855	0.577	0.5	0.0151447	0	WIPF2
GOLGA3	6.04788e-07	0.481961	0.58	0.499	0.0152346	0	GOLGA3
2025-03-06	6.06937e-07	0.322246	0.652	0.563	0.0152887	0	2025-03-06
ATXN7L3B	6.14076e-07	0.317139	0.606	0.522	0.0154686	0	ATXN7L3B
HEBP2	6.19882e-07	0.269711	0.682	0.615	0.0156148	0	HEBP2
C5orf15	6.37848e-07	0.312521	0.516	0.429	0.0160674	0	C5orf15
MCTP2	6.41323e-07	0.88477	0.311	0.232	0.0161549	0	MCTP2
SCNN1A	6.43178e-07	0.606111	0.488	0.407	0.0162016	0	SCNN1A
TMEM259	6.45866e-07	0.321875	0.62	0.538	0.0162694	0	TMEM259
ATP8A1	6.51293e-07	0.613747	0.369	0.284	0.0164061	0	ATP8A1
PCSK7	6.68734e-07	0.41064	0.572	0.491	0.0168454	0	PCSK7
PPL	6.68921e-07	1.22267	0.274	0.195	0.0168501	0	PPL
TMEM63A	6.75316e-07	0.441362	0.567	0.498	0.0170112	0	TMEM63A
HERC4	7.00955e-07	0.381651	0.462	0.378	0.017657	0	HERC4
C1GALT1	7.11927e-07	0.327847	0.581	0.502	0.0179334	0	C1GALT1
COPG1	7.29562e-07	0.28073	0.534	0.452	0.0183777	0	COPG1
AGFG1	7.66345e-07	0.512258	0.544	0.478	0.0193042	0	AGFG1
SMPDL3A	8.06444e-07	0.968069	0.255	0.182	0.0203143	0	SMPDL3A
YOD1	8.12909e-07	0.796237	0.361	0.282	0.0204772	0	YOD1
RSPH1	8.17037e-07	0.705551	0.312	0.228	0.0205812	0	RSPH1
FRMD4B	8.69846e-07	0.511721	0.328	0.244	0.0219114	0	FRMD4B
REEP6	8.98716e-07	0.642064	0.333	0.249	0.0226386	0	REEP6
ASCC3	9.36933e-07	0.469618	0.538	0.451	0.0236013	0	ASCC3
MINDY2	9.42441e-07	0.29781	0.467	0.385	0.0237401	0	MINDY2
DIAPH1	9.73124e-07	0.266026	0.786	0.683	0.024513	0	DIAPH1
TRIM2	1.02028e-06	0.263687	0.63	0.558	0.0257009	0	TRIM2
CYB5R3	1.02872e-06	0.320212	0.611	0.543	0.0259133	0	CYB5R3
MDM2	1.08947e-06	0.659112	0.571	0.497	0.0274437	0	MDM2
RNPEP	1.09624e-06	0.450502	0.557	0.476	0.0276143	0	RNPEP
RIN2	1.12534e-06	0.570318	0.405	0.332	0.0283472	0	RIN2
BCL9L	1.14061e-06	0.340869	0.48	0.391	0.0287318	0	BCL9L
ACTN1	1.14567e-06	0.368019	0.716	0.642	0.0288593	0	ACTN1
TRADD	1.19055e-06	0.50486	0.353	0.268	0.02999	0	TRADD
EIF3G	1.26094e-06	0.313081	0.722	0.631	0.0317631	0	EIF3G
MGLL	1.3097e-06	0.373597	0.512	0.434	0.0329913	0	MGLL
ECH1	1.32325e-06	0.267647	0.548	0.478	0.0333327	0	ECH1
SDR16C5	1.3771e-06	0.358171	0.301	0.215	0.0346893	0	SDR16C5
PROM2	1.37846e-06	0.481033	0.381	0.3	0.0347233	0	PROM2
INSIG1	1.39772e-06	0.439374	0.513	0.44	0.0352085	0	INSIG1
PARP12	1.41578e-06	0.521865	0.394	0.31	0.0356636	0	PARP12
TRAF7	1.43581e-06	0.527765	0.499	0.424	0.036168	0	TRAF7
PIP5K1B	1.45257e-06	0.678786	0.382	0.308	0.0365902	0	PIP5K1B
ZNF618	1.49238e-06	0.597407	0.319	0.235	0.037593	0	ZNF618
CMIP	1.543e-06	0.336016	0.554	0.462	0.0388681	0	CMIP
PSMC4	1.54642e-06	0.422591	0.548	0.471	0.0389544	0	PSMC4
KCNN4	1.56082e-06	0.700996	0.382	0.301	0.0393171	0	KCNN4
PSMD1	1.6031e-06	0.293132	0.686	0.59	0.040382	0	PSMD1
RDH11	1.606e-06	0.391333	0.548	0.466	0.0404551	0	RDH11
LAMB2	1.71296e-06	0.63736	0.355	0.273	0.0431495	0	LAMB2
RBCK1	1.86047e-06	0.271516	0.619	0.541	0.0468651	0	RBCK1
DAB2IP	1.86327e-06	0.439435	0.42	0.334	0.0469359	0	DAB2IP
STXBP2	1.88025e-06	0.550153	0.373	0.297	0.0473636	0	STXBP2
ICA1	1.91493e-06	0.399105	0.545	0.471	0.0482371	0	ICA1
IFIH1	1.93618e-06	0.418041	0.417	0.334	0.0487724	0	IFIH1
RBFOX2	1.95477e-06	0.334351	0.433	0.345	0.0492407	0	RBFOX2
TMEM181	1.9697e-06	0.266796	0.619	0.525	0.0496168	0	TMEM181
RETSAT	2.01904e-06	0.453426	0.418	0.341	0.0508596	0	RETSAT
TNRC18	2.04443e-06	0.389537	0.592	0.508	0.0514992	0	TNRC18
C9orf3	2.06214e-06	0.564251	0.432	0.355	0.0519452	0	C9orf3
IRAK2	2.06679e-06	0.424873	0.282	0.2	0.0520623	0	IRAK2
FEZ2	2.13506e-06	0.556674	0.369	0.293	0.0537821	0	FEZ2
CRYBG1	2.15711e-06	0.454211	0.523	0.435	0.0543376	0	CRYBG1
GNAQ	2.34202e-06	0.332427	0.628	0.556	0.0589955	0	GNAQ
FERMT1	2.34208e-06	0.329898	0.676	0.575	0.0589971	0	FERMT1
IL4R	2.42109e-06	0.634639	0.356	0.277	0.0609874	0	IL4R
TRIM14	2.49602e-06	0.568409	0.49	0.417	0.0628748	0	TRIM14
BIRC6	2.51866e-06	0.251572	0.64	0.578	0.0634449	0	BIRC6
ITPK1	2.52528e-06	0.572545	0.463	0.391	0.0636119	0	ITPK1
PPIP5K2	2.59661e-06	0.439504	0.422	0.345	0.0654087	0	PPIP5K2
EFR3A	2.79278e-06	0.324958	0.581	0.507	0.0703502	0	EFR3A
ELK4	2.86276e-06	0.31412	0.459	0.379	0.0721129	0	ELK4
CXXC5	2.98351e-06	0.495165	0.558	0.491	0.0751546	0	CXXC5
MIRLET7BHG	3.01818e-06	1.02571	0.296	0.225	0.076028	0	MIRLET7BHG
VEZT	3.0607e-06	0.322997	0.54	0.464	0.077099	0	VEZT
SETX	3.14124e-06	0.330505	0.682	0.597	0.0791278	0	SETX
TNFSF15	3.32876e-06	0.614528	0.264	0.189	0.0838514	0	TNFSF15
VSNL1	3.37317e-06	0.385899	0.497	0.396	0.0849701	0	VSNL1
RAI1	3.48444e-06	0.686688	0.346	0.27	0.087773	0	RAI1
SLCO4A1	3.52766e-06	0.529781	0.389	0.314	0.0888617	0	SLCO4A1
TWF1	3.52875e-06	0.333403	0.605	0.541	0.0888893	0	TWF1
CRIP1	3.76069e-06	0.370682	0.586	0.515	0.0947317	0	CRIP1
UBR4	3.80837e-06	0.320744	0.589	0.516	0.0959328	0	UBR4
PLSCR1	3.83586e-06	0.25566	0.641	0.566	0.0966254	0	PLSCR1
PGLS	3.83761e-06	0.418244	0.533	0.463	0.0966693	0	PGLS
PTER	3.94186e-06	0.449238	0.432	0.356	0.0992955	0	PTER
PTK2	4.05172e-06	0.382449	0.575	0.502	0.102063	0	PTK2
SHISA5	4.12726e-06	0.288019	0.608	0.534	0.103966	0	SHISA5
ALDH3A2	4.18717e-06	0.487253	0.528	0.453	0.105475	0	ALDH3A2
SUPT5H	4.29217e-06	0.32273	0.6	0.539	0.10812	0	SUPT5H
PRR15	4.78942e-06	0.527542	0.283	0.211	0.120646	0	PRR15
DENND1B	4.95047e-06	0.551398	0.336	0.26	0.124702	0	DENND1B
ENTPD6	4.98921e-06	0.430489	0.421	0.346	0.125678	0	ENTPD6
LACTB	5.10289e-06	0.618681	0.351	0.278	0.128542	0	LACTB
GDA	5.29783e-06	0.68301	0.304	0.228	0.133452	0	GDA
MAFK	5.32565e-06	0.497057	0.376	0.299	0.134153	0	MAFK
ANO6	5.4635e-06	0.367208	0.459	0.377	0.137626	0	ANO6
DESI1	5.62468e-06	0.446693	0.454	0.373	0.141686	0	DESI1
SLC4A11	5.64486e-06	0.995159	0.281	0.207	0.142194	0	SLC4A11
AL022323.4	5.70366e-06	0.729962	0.27	0.194	0.143675	0	AL022323.4
KCNK6	5.72785e-06	0.465801	0.368	0.29	0.144285	0	KCNK6
C17orf97	5.88529e-06	0.702376	0.29	0.216	0.14825	0	C17orf97
CLPX	5.90695e-06	0.277081	0.494	0.42	0.148796	0	CLPX
FTX	6.29705e-06	0.271216	0.391	0.302	0.158623	0	FTX
PYGB	6.29782e-06	0.546295	0.551	0.484	0.158642	0	PYGB
ESRP2	6.44641e-06	0.491225	0.316	0.239	0.162385	0	ESRP2
EGFR	6.79049e-06	0.417341	0.476	0.399	0.171052	0	EGFR
VPS13D	6.8889e-06	0.521916	0.413	0.345	0.173531	0	VPS13D
SLC16A1	7.00063e-06	0.270055	0.607	0.511	0.176346	0	SLC16A1
COPB2	7.1864e-06	0.387919	0.631	0.577	0.181025	0	COPB2
GTPBP1	7.18991e-06	0.536844	0.349	0.279	0.181114	0	GTPBP1
MNT	7.48586e-06	0.476481	0.361	0.29	0.188569	0	MNT
RALB	7.73228e-06	0.302808	0.412	0.338	0.194776	0	RALB
ZYX	7.79462e-06	0.321588	0.524	0.44	0.196346	0	ZYX
HACD2	7.97632e-06	0.288373	0.575	0.502	0.200924	0	HACD2
RFLNA	8.16829e-06	0.532286	0.325	0.249	0.205759	0	RFLNA
ITGB8	8.24463e-06	0.584935	0.299	0.221	0.207682	0	ITGB8
TLE1	8.29378e-06	0.320369	0.412	0.331	0.20892	0	TLE1
TUT7	8.33464e-06	0.294523	0.475	0.399	0.20995	0	TUT7
BEND7	8.44735e-06	0.364147	0.343	0.267	0.212789	0	BEND7
APPL2	8.54686e-06	0.367093	0.422	0.346	0.215295	0	APPL2
DUSP6	9.05994e-06	0.394192	0.465	0.383	0.22822	0	DUSP6
CEMIP	9.08728e-06	0.743518	0.301	0.227	0.228909	0	CEMIP
EPN2	9.26768e-06	0.545144	0.365	0.289	0.233453	0	EPN2
PNPLA4	9.60946e-06	0.473017	0.373	0.3	0.242062	0	PNPLA4
ARL14	9.72948e-06	0.296676	0.377	0.3	0.245086	0	ARL14
ABHD11	1.00657e-05	0.459382	0.475	0.391	0.253555	0	ABHD11
ARHGAP27	1.10391e-05	0.653767	0.314	0.24	0.278076	0	ARHGAP27
CXorf38	1.10479e-05	0.523758	0.433	0.361	0.278297	0	CXorf38
SUSD6	1.10826e-05	0.507649	0.365	0.291	0.279171	0	SUSD6
NR1H2	1.12502e-05	0.778474	0.269	0.2	0.283392	0	NR1H2
USH1C	1.14515e-05	0.479773	0.433	0.364	0.288462	0	USH1C
SEC24D	1.15315e-05	0.459297	0.423	0.359	0.290478	0	SEC24D
PQLC3	1.16629e-05	0.527049	0.31	0.235	0.293789	0	PQLC3
CRYBG3	1.23423e-05	0.738337	0.325	0.256	0.310902	0	CRYBG3
BLNK	1.26412e-05	0.471533	0.279	0.211	0.318433	0	BLNK
TMEM50B	1.30177e-05	0.443477	0.493	0.43	0.327917	0	TMEM50B
STX4	1.31688e-05	0.547775	0.403	0.335	0.331723	0	STX4
LRRC8A	1.34426e-05	0.358295	0.506	0.453	0.338619	0	LRRC8A
IL13RA1	1.38444e-05	0.26697	0.487	0.428	0.348741	0	IL13RA1
LIMCH1	1.39174e-05	0.738402	0.302	0.229	0.350579	0	LIMCH1
SMG7	1.39374e-05	0.507402	0.508	0.447	0.351082	0	SMG7
FNBP4	1.4311e-05	0.509302	0.58	0.515	0.360494	0	FNBP4
PITPNB	1.46511e-05	0.281407	0.635	0.554	0.369061	0	PITPNB
SPG7	1.49746e-05	0.455651	0.528	0.461	0.377211	0	SPG7
LTBR	1.53373e-05	0.308511	0.552	0.492	0.386345	0	LTBR
RNF19B	1.55934e-05	0.367717	0.408	0.336	0.392797	0	RNF19B
UBR2	1.57458e-05	0.277822	0.549	0.484	0.396637	0	UBR2
DCP1A	1.60362e-05	0.260836	0.448	0.381	0.403951	0	DCP1A
RAB11FIP4	1.61992e-05	0.382555	0.349	0.272	0.408057	0	RAB11FIP4
LGR4	1.66446e-05	0.252804	0.556	0.477	0.419278	0	LGR4
PATJ	1.70889e-05	0.465804	0.521	0.454	0.43047	0	PATJ
PPCS	1.72642e-05	0.326349	0.601	0.539	0.434885	0	PPCS
TPP1	1.75577e-05	0.403141	0.439	0.365	0.442279	0	TPP1
MLX	1.77439e-05	0.340502	0.46	0.391	0.446968	0	MLX
TTYH3	1.85233e-05	0.632708	0.319	0.245	0.466602	0	TTYH3
SSH3	1.8616e-05	0.477203	0.257	0.188	0.468937	0	SSH3
ZNF562	1.90057e-05	0.619534	0.378	0.314	0.478753	0	ZNF562
TRIP12	1.95507e-05	0.265602	0.612	0.555	0.492483	0	TRIP12
SIRT7	1.95908e-05	0.366582	0.433	0.366	0.493492	0	SIRT7
MYO5B	2.02452e-05	0.440652	0.437	0.369	0.509978	0	MYO5B
KIAA1217	2.03908e-05	0.287704	0.437	0.352	0.513645	0	KIAA1217
AP1AR	2.0754e-05	0.366085	0.47	0.393	0.522793	0	AP1AR
ATG2B	2.0857e-05	0.929867	0.277	0.21	0.525387	0	ATG2B
RBMS2	2.12182e-05	0.483904	0.314	0.245	0.534486	0	RBMS2
ARHGAP12	2.42459e-05	0.357249	0.558	0.502	0.610755	0	ARHGAP12
STAT2	2.43703e-05	0.384789	0.378	0.306	0.613888	0	STAT2
TMEM159	2.46909e-05	0.29904	0.424	0.358	0.621965	0	TMEM159
SBNO2	2.49017e-05	0.382732	0.438	0.37	0.627274	0	SBNO2
USP54	2.51768e-05	0.732158	0.269	0.202	0.634203	0	USP54
PVT1	2.52206e-05	0.694659	0.36	0.286	0.635306	0	PVT1
RPS6KA1	2.52847e-05	0.61912	0.441	0.38	0.636921	0	RPS6KA1
USP43	2.54485e-05	0.482165	0.273	0.204	0.641049	0	USP43
SDC1	2.60715e-05	0.306567	0.558	0.489	0.65674	0	SDC1
SAMD12	2.61987e-05	0.431319	0.321	0.253	0.659945	0	SAMD12
SEC14L1	2.63543e-05	0.479028	0.407	0.344	0.663864	0	SEC14L1
URB1	2.80146e-05	0.684958	0.317	0.246	0.705689	0	URB1
ALAS1	2.85478e-05	0.543225	0.405	0.342	0.719119	0	ALAS1
TNS4	2.88496e-05	0.466008	0.436	0.347	0.726722	0	TNS4
GALC	3.01236e-05	0.38623	0.388	0.318	0.758813	0	GALC
NTHL1	3.08902e-05	0.474436	0.459	0.387	0.778123	0	NTHL1
SIL1	3.10501e-05	0.415841	0.453	0.386	0.782152	0	SIL1
PITX1	3.14146e-05	0.442669	0.431	0.356	0.791334	0	PITX1
MAP2K6	3.14886e-05	0.773402	0.287	0.22	0.793198	0	MAP2K6
ETV6	3.15424e-05	0.506516	0.431	0.367	0.794553	0	ETV6
USF1	3.21806e-05	0.767579	0.264	0.198	0.810629	0	USF1
YIPF5	3.29536e-05	0.312421	0.455	0.389	0.830102	0	YIPF5
FUCA1	3.33095e-05	0.458459	0.3	0.232	0.839066	0	FUCA1
MAGED1	3.45977e-05	0.450869	0.395	0.326	0.871515	0	MAGED1
SH3RF1	3.53996e-05	0.28577	0.518	0.446	0.891716	0	SH3RF1
ADAP1	3.64935e-05	0.503647	0.446	0.374	0.919271	0	ADAP1
RARG	3.78794e-05	0.71884	0.274	0.206	0.954183	0	RARG
JOSD1	3.83202e-05	0.258351	0.584	0.522	0.965286	0	JOSD1
CHD7	3.97248e-05	0.372248	0.567	0.502	1	0	CHD7
OGFR	4.00178e-05	0.485709	0.454	0.385	1	0	OGFR
TBRG1	4.01673e-05	0.38389	0.493	0.427	1	0	TBRG1
NPAS2	4.05895e-05	0.309882	0.285	0.219	1	0	NPAS2
SLC35A1	4.06008e-05	0.611396	0.349	0.288	1	0	SLC35A1
ENDOD1	4.07753e-05	0.452771	0.383	0.314	1	0	ENDOD1
EPPK1	4.17163e-05	0.358498	0.519	0.45	1	0	EPPK1
EFCAB14	4.20985e-05	0.266469	0.637	0.56	1	0	EFCAB14
PTPN14	4.22908e-05	0.535062	0.256	0.187	1	0	PTPN14
C5orf30	4.31782e-05	0.52521	0.262	0.199	1	0	C5orf30
STK3	4.34679e-05	0.370373	0.469	0.402	1	0	STK3
PACSIN2	4.37924e-05	0.442021	0.486	0.43	1	0	PACSIN2
CAB39	4.41611e-05	0.388835	0.491	0.439	1	0	CAB39
JCAD	4.4957e-05	0.712199	0.281	0.209	1	0	JCAD
BCAR1	4.56931e-05	0.47227	0.416	0.35	1	0	BCAR1
DUSP8	4.68981e-05	0.553116	0.295	0.224	1	0	DUSP8
METTL14	4.80208e-05	0.272814	0.257	0.193	1	0	METTL14
MTUS1	4.83593e-05	0.312541	0.596	0.537	1	0	MTUS1
SCYL2	4.93355e-05	0.481081	0.433	0.37	1	0	SCYL2
SPTSSA	5.1339e-05	0.271441	0.56	0.491	1	0	SPTSSA
ANKRD22	5.18506e-05	0.394983	0.374	0.302	1	0	ANKRD22
MPZL2	5.23305e-05	0.404624	0.343	0.278	1	0	MPZL2
TRIM56	5.24847e-05	0.33154	0.575	0.507	1	0	TRIM56
NCOA4	5.2911e-05	0.295669	0.581	0.526	1	0	NCOA4
SULF2	5.50062e-05	0.551496	0.309	0.236	1	0	SULF2
YIPF2	5.63882e-05	0.442516	0.399	0.339	1	0	YIPF2
MIB2	5.65221e-05	0.363606	0.478	0.408	1	0	MIB2
TLCD2	6.24639e-05	0.593798	0.265	0.2	1	0	TLCD2
COL4A3BP	6.35591e-05	0.332854	0.544	0.482	1	0	COL4A3BP
DTX2	6.49612e-05	0.457513	0.383	0.317	1	0	DTX2
DHRS1	6.74417e-05	0.477405	0.326	0.263	1	0	DHRS1
NECAP1	6.82897e-05	0.342996	0.371	0.303	1	0	NECAP1
CNIH1	6.91275e-05	0.293902	0.578	0.499	1	0	CNIH1
IWS1	7.00473e-05	0.365874	0.54	0.477	1	0	IWS1
FBLIM1	7.15931e-05	0.632356	0.278	0.211	1	0	FBLIM1
EDN1	7.55613e-05	0.344398	0.265	0.201	1	0	EDN1
BTN3A2	7.58155e-05	0.304933	0.419	0.349	1	0	BTN3A2
IMPACT	7.91103e-05	0.641416	0.379	0.322	1	0	IMPACT
NADSYN1	8.15287e-05	0.845212	0.344	0.285	1	0	NADSYN1
CCDC125	8.22625e-05	0.420095	0.333	0.265	1	0	CCDC125
SLC35B3	8.3082e-05	0.539634	0.321	0.255	1	0	SLC35B3
TRAPPC12	8.3157e-05	0.908179	0.27	0.211	1	0	TRAPPC12
SBF2	8.38851e-05	0.421992	0.307	0.242	1	0	SBF2
MAST2	8.41822e-05	0.834038	0.283	0.22	1	0	MAST2
ANK3	9.16783e-05	0.466702	0.378	0.315	1	0	ANK3
FUT6	9.23985e-05	0.694416	0.271	0.208	1	0	FUT6
CCDC88C	9.33328e-05	0.45833	0.394	0.33	1	0	CCDC88C
DGCR2	9.37545e-05	0.825086	0.282	0.224	1	0	DGCR2
ARNTL2	9.80845e-05	0.369457	0.42	0.351	1	0	ARNTL2
DIAPH2	0.000101112	0.532403	0.471	0.416	1	0	DIAPH2
EAPP	0.000103146	0.267515	0.476	0.423	1	0	EAPP
TRAPPC4	0.00010567	0.373937	0.492	0.427	1	0	TRAPPC4
TSC2	0.000108141	0.601617	0.326	0.264	1	0	TSC2
ITPKC	0.000111109	0.389087	0.285	0.219	1	0	ITPKC
RAB3GAP1	0.000111495	0.439054	0.394	0.33	1	0	RAB3GAP1
MAP4K3	0.000112934	0.433372	0.341	0.281	1	0	MAP4K3
ATG12	0.000114368	0.260167	0.571	0.511	1	0	ATG12
ZSWIM6	0.000114477	0.372664	0.346	0.272	1	0	ZSWIM6
SDCCAG8	0.000114582	0.407162	0.473	0.405	1	0	SDCCAG8
ACSS2	0.000115226	0.635444	0.35	0.289	1	0	ACSS2
ATAD1	0.000118699	0.267866	0.412	0.348	1	0	ATAD1
SPRY1	0.000122432	0.292668	0.333	0.27	1	0	SPRY1
AP3S1	0.00012283	0.290624	0.49	0.434	1	0	AP3S1
TMEM263	0.000127871	0.356697	0.381	0.312	1	0	TMEM263
MOB3B	0.000128001	0.257773	0.347	0.285	1	0	MOB3B
SEC13	0.000129852	0.315601	0.506	0.445	1	0	SEC13
GGA1	0.000134127	0.310716	0.441	0.381	1	0	GGA1
NFAT5	0.000135656	0.357118	0.504	0.449	1	0	NFAT5
TGIF1	0.000153181	0.279646	0.51	0.442	1	0	TGIF1
FBXL5	0.000155863	0.345436	0.407	0.345	1	0	FBXL5
TICAM1	0.000156352	0.351842	0.267	0.207	1	0	TICAM1
MED15	0.000158693	0.445439	0.446	0.383	1	0	MED15
CLUAP1	0.000158889	0.471102	0.287	0.225	1	0	CLUAP1
HGSNAT	0.000160235	0.411969	0.392	0.334	1	0	HGSNAT
NOL4L	0.000162818	0.294093	0.285	0.217	1	0	NOL4L
IRF3	0.000171147	0.440031	0.522	0.469	1	0	IRF3
REX1BD	0.000177211	0.25121	0.59	0.523	1	0	REX1BD
TBC1D9B	0.000186417	0.449254	0.403	0.344	1	0	TBC1D9B
NFE2L3	0.000193543	0.409379	0.521	0.45	1	0	NFE2L3
KCNC4	0.000193644	0.605543	0.306	0.246	1	0	KCNC4
KDELR3	0.000195321	0.581303	0.364	0.309	1	0	KDELR3
SNRK	0.000196139	0.423989	0.304	0.241	1	0	SNRK
ZBTB11	0.00019691	0.320879	0.448	0.398	1	0	ZBTB11
ASAP2	0.000200922	0.424108	0.447	0.386	1	0	ASAP2
GTF2E2	0.00020618	0.403894	0.431	0.374	1	0	GTF2E2
KDM1B	0.000219003	0.347682	0.413	0.351	1	0	KDM1B
HIVEP1	0.000222609	0.278099	0.405	0.345	1	0	HIVEP1
PLCD3	0.000224086	0.558624	0.333	0.277	1	0	PLCD3
INSIG2	0.000228547	0.731555	0.273	0.213	1	0	INSIG2
FARP2	0.000229499	0.418403	0.476	0.417	1	0	FARP2
DNASE1L1	0.000235352	0.465597	0.252	0.195	1	0	DNASE1L1
KLHL24	0.000237804	0.256465	0.403	0.338	1	0	KLHL24
ZNF587	0.000242079	0.401358	0.338	0.269	1	0	ZNF587
GIPC1	0.000242921	0.264637	0.501	0.445	1	0	GIPC1
BNIP2	0.000245376	0.498977	0.445	0.388	1	0	BNIP2
CASZ1	0.000246294	0.252532	0.494	0.431	1	0	CASZ1
SYBU	0.000246361	0.517872	0.331	0.276	1	0	SYBU
TNFRSF11A	0.00024696	0.602836	0.318	0.258	1	0	TNFRSF11A
FBXW4	0.000247704	0.394068	0.354	0.294	1	0	FBXW4
COQ10B	0.000252328	0.446894	0.377	0.312	1	0	COQ10B
ZMYM4	0.00025998	0.500696	0.406	0.347	1	0	ZMYM4
PER2	0.000261623	0.599753	0.318	0.257	1	0	PER2
PLS3	0.000262894	0.335094	0.414	0.362	1	0	PLS3
ADD1	0.000264272	0.355284	0.548	0.496	1	0	ADD1
APC	0.000275323	0.306183	0.403	0.343	1	0	APC
AP2A2	0.0002883	0.421581	0.476	0.418	1	0	AP2A2
PMM2	0.000288609	0.53044	0.446	0.389	1	0	PMM2
SLC30A7	0.000290296	0.271257	0.46	0.407	1	0	SLC30A7
NR2C1	0.000293538	0.713093	0.275	0.217	1	0	NR2C1
MTREX	0.000296009	0.253457	0.601	0.537	1	0	MTREX
PCYT2	0.000316697	0.574957	0.387	0.325	1	0	PCYT2
SEC23A	0.00032084	0.447476	0.418	0.356	1	0	SEC23A
SGMS1	0.000335413	0.368719	0.304	0.247	1	0	SGMS1
FDXR	0.000338568	0.726409	0.251	0.194	1	0	FDXR
CCNL2	0.000343196	0.597988	0.485	0.428	1	0	CCNL2
MAP7	0.000348941	0.442912	0.551	0.495	1	0	MAP7
ALDOA	0.000350971	0.586433	0.346	0.295	1	0	ALDOA
GORASP2	0.000353742	0.347449	0.518	0.465	1	0	GORASP2
HID1	0.000408556	0.404076	0.49	0.433	1	0	HID1
TGFBR3	0.000410354	0.273484	0.26	0.203	1	0	TGFBR3
GPR107	0.000412742	0.542068	0.363	0.309	1	0	GPR107
MAPRE2	0.000414989	0.450875	0.338	0.281	1	0	MAPRE2
ERAP1	0.000422173	0.339518	0.385	0.332	1	0	ERAP1
AREG	0.00042237	0.415347	0.364	0.298	1	0	AREG
TMEM154	0.000449217	0.409557	0.26	0.205	1	0	TMEM154
DTX3L	0.000455138	0.265674	0.557	0.499	1	0	DTX3L
TMEM51	0.000458064	0.399324	0.334	0.283	1	0	TMEM51
PRRG1	0.000461322	0.531808	0.321	0.264	1	0	PRRG1
STEAP1	0.000464999	0.469621	0.363	0.307	1	0	STEAP1
ETV7	0.000471521	0.718661	0.321	0.269	1	0	ETV7
HYAL2	0.000473524	0.429922	0.278	0.224	1	0	HYAL2
RRM2B	0.000482177	0.314587	0.354	0.294	1	0	RRM2B
HIST3H2A	0.00048526	0.560367	0.3	0.241	1	0	HIST3H2A
KIAA0355	0.000517877	0.332679	0.28	0.218	1	0	KIAA0355
SLC50A1	0.000526947	0.320444	0.438	0.384	1	0	SLC50A1
ANKRD10	0.000533443	0.325211	0.56	0.507	1	0	ANKRD10
PKP4	0.000564246	0.322122	0.611	0.548	1	0	PKP4
NR2F6	0.000568647	0.261371	0.541	0.489	1	0	NR2F6
HGS	0.000569741	0.39867	0.474	0.423	1	0	HGS
KLHL28	0.000574578	0.315512	0.295	0.237	1	0	KLHL28
BLZF1	0.000578773	0.337778	0.349	0.296	1	0	BLZF1
WDR60	0.000581198	0.703519	0.343	0.287	1	0	WDR60
MXI1	0.000585283	0.432156	0.383	0.332	1	0	MXI1
FAM222B	0.000587211	0.431501	0.261	0.207	1	0	FAM222B
ERICH1	0.0005892	0.356922	0.368	0.317	1	0	ERICH1
RELA	0.00060078	0.38909	0.436	0.387	1	0	RELA
GUCD1	0.000606766	0.328637	0.386	0.333	1	0	GUCD1
GNS	0.000608719	0.415448	0.369	0.319	1	0	GNS
FOXA1	0.000617519	0.266986	0.543	0.49	1	0	FOXA1
ALDH5A1	0.000620332	0.711574	0.292	0.242	1	0	ALDH5A1
LDLRAP1	0.000634353	0.545867	0.324	0.271	1	0	LDLRAP1
SLC9B2	0.000664452	0.418738	0.299	0.243	1	0	SLC9B2
UVSSA	0.000682154	0.456272	0.353	0.295	1	0	UVSSA
TMEM41B	0.000692634	0.360333	0.47	0.422	1	0	TMEM41B
BTBD10	0.000735617	0.266802	0.346	0.289	1	0	BTBD10
AC010503.4	0.000736895	0.399079	0.271	0.219	1	0	AC010503.4
AC008397.1	0.000747667	0.443019	0.335	0.276	1	0	AC008397.1
RFFL	0.000748592	0.417905	0.304	0.25	1	0	RFFL
MSANTD4	0.000755799	0.466364	0.267	0.212	1	0	MSANTD4
DDA1	0.000783919	0.37726	0.389	0.344	1	0	DDA1
ANXA13	0.000807276	0.606887	0.264	0.209	1	0	ANXA13
LRCH4	0.000809045	0.371965	0.298	0.248	1	0	LRCH4
RYK	0.000813585	0.401412	0.425	0.38	1	0	RYK
IRF7	0.000814415	0.428599	0.256	0.203	1	0	IRF7
SNX9	0.000815464	0.261083	0.546	0.498	1	0	SNX9
ZBTB7B	0.000828858	0.337072	0.338	0.283	1	0	ZBTB7B
CSNK1G3	0.000849589	0.4609	0.433	0.377	1	0	CSNK1G3
ACAP2	0.000851797	0.370363	0.523	0.466	1	0	ACAP2
BECN1	0.000853046	0.317621	0.436	0.393	1	0	BECN1
RASAL2	0.000860372	0.352086	0.339	0.282	1	0	RASAL2
IRF6	0.000861213	0.286131	0.383	0.328	1	0	IRF6
CFD	0.000892677	0.359142	0.379	0.322	1	0	CFD
MIGA1	0.00090224	0.534718	0.416	0.376	1	0	MIGA1
TMEM65	0.000928852	0.43626	0.259	0.207	1	0	TMEM65
SYMPK	0.000942321	0.328724	0.371	0.317	1	0	SYMPK
BAZ2B	0.000944151	0.280651	0.469	0.412	1	0	BAZ2B
SC5D	0.00095034	0.30651	0.379	0.325	1	0	SC5D
PAK4	0.000950358	0.264787	0.372	0.31	1	0	PAK4
XPC	0.000957091	0.428981	0.433	0.38	1	0	XPC
SOWAHC	0.00100655	0.494784	0.281	0.23	1	0	SOWAHC
IQCE	0.00101031	0.55389	0.387	0.337	1	0	IQCE
CNOT8	0.00103142	0.58474	0.32	0.268	1	0	CNOT8
CASP8	0.00103815	0.355539	0.48	0.433	1	0	CASP8
TPCN1	0.00105897	0.477013	0.267	0.214	1	0	TPCN1
SPATA13	0.00110053	0.319388	0.437	0.378	1	0	SPATA13
COG6	0.00111493	0.57712	0.281	0.233	1	0	COG6
TRPM4	0.00113448	0.351736	0.281	0.224	1	0	TRPM4
RIPK4	0.00114077	0.302705	0.255	0.202	1	0	RIPK4
PNPLA8	0.00114739	0.3655	0.446	0.396	1	0	PNPLA8
FAM117B	0.00115438	0.658513	0.299	0.248	1	0	FAM117B
SEPT10	0.00115599	0.395419	0.397	0.348	1	0	SEPT10
XRRA1	0.00116	0.495705	0.455	0.409	1	0	XRRA1
PLEKHA5	0.00116929	0.358552	0.481	0.425	1	0	PLEKHA5
CYTH3	0.00119017	0.501771	0.253	0.203	1	0	CYTH3
PCYT1A	0.00120261	0.534768	0.386	0.338	1	0	PCYT1A
SLC15A4	0.00120919	0.545069	0.264	0.214	1	0	SLC15A4
DNAJB4	0.00121676	0.304503	0.319	0.267	1	0	DNAJB4
CDYL	0.00121931	0.425181	0.37	0.315	1	0	CDYL
PWWP2B	0.0012395	0.48352	0.251	0.199	1	0	PWWP2B
SIRT1	0.00125133	0.453757	0.381	0.335	1	0	SIRT1
ZDHHC21	0.00125649	0.516307	0.389	0.336	1	0	ZDHHC21
PTPRJ	0.00126223	0.347878	0.369	0.323	1	0	PTPRJ
LENG8	0.00130656	0.306193	0.454	0.402	1	0	LENG8
RLIM	0.00132032	0.440221	0.412	0.365	1	0	RLIM
IGF2BP2	0.00132131	0.473667	0.446	0.396	1	0	IGF2BP2
SETD7	0.00134897	0.274856	0.4	0.344	1	0	SETD7
MARK3	0.00138047	0.307675	0.506	0.458	1	0	MARK3
SPOPL	0.00139798	0.343389	0.376	0.322	1	0	SPOPL
BMS1	0.00148448	0.412784	0.519	0.473	1	0	BMS1
ANKRD17	0.0014922	0.29504	0.611	0.564	1	0	ANKRD17
FAM98C	0.00149515	0.535019	0.269	0.222	1	0	FAM98C
RDH13	0.00150317	0.51912	0.316	0.27	1	0	RDH13
TOX3	0.0015093	0.269578	0.416	0.366	1	0	TOX3
AVPI1	0.00151931	0.378011	0.309	0.261	1	0	AVPI1
ELMO3	0.00154663	0.656449	0.334	0.293	1	0	ELMO3
LAMTOR2	0.00160093	0.277135	0.508	0.462	1	0	LAMTOR2
CHIC2	0.0016276	0.466707	0.253	0.206	1	0	CHIC2
CTDSP1	0.00164137	0.252142	0.399	0.344	1	0	CTDSP1
STAMBPL1	0.00164882	0.539453	0.311	0.263	1	0	STAMBPL1
ZCCHC9	0.00166381	0.323853	0.373	0.328	1	0	ZCCHC9
PCGF5	0.00166536	0.354159	0.523	0.479	1	0	PCGF5
ITGAV	0.00167833	0.25049	0.442	0.4	1	0	ITGAV
DIP2B	0.00168362	0.478989	0.353	0.303	1	0	DIP2B
TNIP2	0.00169186	0.390041	0.416	0.355	1	0	TNIP2
EHBP1L1	0.00173078	0.433878	0.398	0.351	1	0	EHBP1L1
HPS4	0.00175238	0.563081	0.265	0.217	1	0	HPS4
HSH2D	0.00177721	0.59714	0.285	0.235	1	0	HSH2D
DNAJC16	0.00178955	0.288722	0.252	0.206	1	0	DNAJC16
KIAA1671	0.00179119	0.390736	0.381	0.326	1	0	KIAA1671
HOTAIRM1	0.00183123	0.328491	0.273	0.224	1	0	HOTAIRM1
TCIRG1	0.00184047	0.446794	0.343	0.293	1	0	TCIRG1
GALNT10	0.00186917	0.348851	0.362	0.311	1	0	GALNT10
RSPH3	0.00187091	0.291265	0.252	0.203	1	0	RSPH3
LRCH1	0.00190399	0.422813	0.327	0.274	1	0	LRCH1
RFX1	0.00199641	0.568466	0.344	0.3	1	0	RFX1
TMEM131	0.00200935	0.279361	0.446	0.402	1	0	TMEM131
FAM98A	0.00203173	0.276919	0.38	0.328	1	0	FAM98A
P4HA2	0.00205842	0.316056	0.328	0.285	1	0	P4HA2
GALNT5	0.00214356	0.391283	0.385	0.334	1	0	GALNT5
KDSR	0.00219166	0.262958	0.548	0.512	1	0	KDSR
KARS	0.00224871	0.271557	0.592	0.543	1	0	KARS
PHF11	0.00225868	0.254388	0.359	0.31	1	0	PHF11
CRK	0.00229125	0.254713	0.588	0.532	1	0	CRK
AC060780.1	0.00229362	0.595805	0.272	0.227	1	0	AC060780.1
SHB	0.00230705	0.462998	0.261	0.215	1	0	SHB
DCTN4	0.00231574	0.27333	0.425	0.379	1	0	DCTN4
LY75	0.0023442	0.467306	0.33	0.285	1	0	LY75
NCOR2	0.00235417	0.448059	0.487	0.45	1	0	NCOR2
C16orf58	0.00237703	0.420094	0.312	0.263	1	0	C16orf58
DGLUCY	0.00238264	0.380255	0.253	0.206	1	0	DGLUCY
ADAM15	0.0024484	0.334303	0.597	0.535	1	0	ADAM15
SLC39A10	0.00246604	0.374521	0.339	0.288	1	0	SLC39A10
IL15RA	0.00249419	0.480621	0.312	0.262	1	0	IL15RA
HMGCR	0.00253107	0.364775	0.442	0.388	1	0	HMGCR
ZNF518A	0.00253457	0.371164	0.524	0.48	1	0	ZNF518A
PPP2R5A	0.00261824	0.257025	0.508	0.463	1	0	PPP2R5A
JAGN1	0.002663	0.25702	0.399	0.343	1	0	JAGN1
FAM114A1	0.00266311	0.267006	0.398	0.349	1	0	FAM114A1
ZNF598	0.00272541	0.468924	0.308	0.263	1	0	ZNF598
USP4	0.00276802	0.594857	0.299	0.257	1	0	USP4
IGFBP4	0.00278779	0.297759	0.472	0.403	1	0	IGFBP4
UBE2F	0.00280182	0.327382	0.336	0.292	1	0	UBE2F
JKAMP	0.00281556	0.36243	0.37	0.322	1	0	JKAMP
SPPL2B	0.00283034	0.540721	0.364	0.322	1	0	SPPL2B
FOXN2	0.00284003	0.33763	0.343	0.293	1	0	FOXN2
C1GALT1C1	0.00284865	0.389818	0.324	0.275	1	0	C1GALT1C1
RBM6	0.0028802	0.282948	0.542	0.5	1	0	RBM6
WDFY3	0.00297629	0.556325	0.256	0.209	1	0	WDFY3
ETV3	0.00327131	0.351486	0.34	0.299	1	0	ETV3
ACADSB	0.00327389	0.622091	0.277	0.233	1	0	ACADSB
HPS3	0.00328624	0.593128	0.306	0.261	1	0	HPS3
EHMT1	0.00333227	0.309592	0.408	0.373	1	0	EHMT1
ANKRD18A	0.00342448	0.768068	0.29	0.248	1	0	ANKRD18A
AP1M2	0.00343076	0.350519	0.475	0.429	1	0	AP1M2
OTUD4	0.00354287	0.25364	0.506	0.468	1	0	OTUD4
CDK5RAP3	0.00361854	0.458305	0.495	0.457	1	0	CDK5RAP3
RIPK1	0.00362544	0.257532	0.289	0.242	1	0	RIPK1
ANKZF1	0.00365567	0.261177	0.259	0.212	1	0	ANKZF1
BSDC1	0.00368536	0.415133	0.407	0.37	1	0	BSDC1
SLC38A10	0.00371137	0.37108	0.436	0.394	1	0	SLC38A10
ZNF544	0.00372874	0.528959	0.287	0.242	1	0	ZNF544
IFNAR1	0.00373515	0.253228	0.481	0.435	1	0	IFNAR1
SLC17A9	0.00376478	0.938181	0.271	0.232	1	0	SLC17A9
TMEM167B	0.00382197	0.34555	0.274	0.229	1	0	TMEM167B
SRGAP1	0.00382644	0.303306	0.289	0.237	1	0	SRGAP1
ZZEF1	0.00393171	0.376993	0.304	0.263	1	0	ZZEF1
GNPTG	0.00397776	0.366369	0.297	0.253	1	0	GNPTG
SCRIB	0.00411484	0.351083	0.392	0.347	1	0	SCRIB
NELFA	0.00412905	0.347371	0.377	0.33	1	0	NELFA
P4HTM	0.00413776	0.350289	0.364	0.322	1	0	P4HTM
USP18	0.00419264	0.307823	0.325	0.278	1	0	USP18
PLLP	0.00420108	0.346453	0.317	0.278	1	0	PLLP
ZMYM5	0.00442318	0.352106	0.295	0.249	1	0	ZMYM5
MAP3K11	0.00446289	0.344141	0.392	0.352	1	0	MAP3K11
NEO1	0.00447755	0.426513	0.314	0.274	1	0	NEO1
MFSD6	0.00494774	0.422574	0.39	0.348	1	0	MFSD6
DDX60L	0.00511188	0.270415	0.287	0.242	1	0	DDX60L
NEK4	0.00515226	0.801019	0.276	0.233	1	0	NEK4
GOLPH3L	0.00515834	0.428828	0.321	0.276	1	0	GOLPH3L
ZNF264	0.00537062	0.457049	0.291	0.252	1	0	ZNF264
KRCC1	0.00539347	0.368243	0.351	0.307	1	0	KRCC1
ENTPD4	0.00562159	0.57449	0.302	0.26	1	0	ENTPD4
CREB3L2	0.00564547	0.278681	0.319	0.272	1	0	CREB3L2
MFSD12	0.00568558	0.31486	0.39	0.35	1	0	MFSD12
MOV10	0.00574336	0.535514	0.33	0.291	1	0	MOV10
ALPK1	0.00579127	0.723446	0.269	0.23	1	0	ALPK1
RUFY3	0.00581791	0.385118	0.377	0.333	1	0	RUFY3
SH3GLB2	0.00596251	0.463887	0.438	0.397	1	0	SH3GLB2
CGAS	0.0059645	0.305181	0.412	0.367	1	0	CGAS
MBIP	0.00597151	0.423009	0.286	0.244	1	0	MBIP
IQANK1	0.00598868	0.254358	0.297	0.253	1	0	IQANK1
C19orf66	0.00603391	0.446045	0.256	0.214	1	0	C19orf66
WASHC5	0.00605646	0.443776	0.329	0.282	1	0	WASHC5
CBLC	0.00608272	0.481722	0.28	0.237	1	0	CBLC
IFT27	0.00609087	0.504171	0.258	0.215	1	0	IFT27
PREP	0.00615581	0.377744	0.36	0.325	1	0	PREP
ABR	0.00619959	0.341794	0.302	0.255	1	0	ABR
F2RL1	0.00623953	0.254983	0.395	0.351	1	0	F2RL1
PKNOX1	0.0062962	0.470159	0.296	0.251	1	0	PKNOX1
NUMA1	0.00645161	0.252357	0.533	0.488	1	0	NUMA1
LUZP1	0.00648169	0.334718	0.358	0.313	1	0	LUZP1
ARHGEF10L	0.00685323	0.498891	0.25	0.21	1	0	ARHGEF10L
RASA2	0.00690252	0.352312	0.357	0.316	1	0	RASA2
EIF4G3	0.00701053	0.311763	0.496	0.464	1	0	EIF4G3
MED8	0.00707104	0.296457	0.318	0.277	1	0	MED8
FAM208B	0.00708668	0.330362	0.492	0.449	1	0	FAM208B
TCF20	0.00708836	0.259418	0.476	0.439	1	0	TCF20
VRK3	0.00714159	0.513936	0.276	0.233	1	0	VRK3
HOXB6	0.00715658	0.582047	0.285	0.244	1	0	HOXB6
OXA1L	0.00722755	0.258242	0.511	0.477	1	0	OXA1L
CIITA	0.00725872	0.330246	0.36	0.313	1	0	CIITA
LYSMD3	0.00729459	0.391237	0.313	0.27	1	0	LYSMD3
TBC1D8B	0.0074185	0.341333	0.268	0.227	1	0	TBC1D8B
PARVA	0.00749078	0.304121	0.321	0.283	1	0	PARVA
NPC1	0.00785867	0.627758	0.272	0.233	1	0	NPC1
BTBD7	0.00794744	0.336021	0.463	0.421	1	0	BTBD7
SRPK2	0.0079899	0.294007	0.424	0.391	1	0	SRPK2
EPAS1	0.00811287	0.415868	0.295	0.25	1	0	EPAS1
FAM160B2	0.00822845	0.434306	0.263	0.221	1	0	FAM160B2
NAB1	0.00825175	0.262547	0.403	0.36	1	0	NAB1
OSBPL3	0.00831055	0.267599	0.364	0.318	1	0	OSBPL3
NDEL1	0.00836772	0.347895	0.332	0.29	1	0	NDEL1
MGRN1	0.00838755	0.355158	0.317	0.275	1	0	MGRN1
REPS2	0.00890657	0.40568	0.31	0.272	1	0	REPS2
NUDCD3	0.00894555	0.380212	0.417	0.386	1	0	NUDCD3
VDR	0.00896203	0.458024	0.339	0.3	1	0	VDR
SLC18B1	0.00926924	0.318894	0.256	0.216	1	0	SLC18B1
ONECUT2	0.00959392	0.377683	0.275	0.232	1	0	ONECUT2
UEVLD	0.009714	0.368592	0.287	0.248	1	0	UEVLD
GRAMD2B	0.00983566	0.606395	0.251	0.213	1	0	GRAMD2B
TOP2A	3.6245e-254	3.76776	0.904	0.148	9.13012e-250	1	TOP2A
MKI67	1.45886e-225	3.32566	0.871	0.164	3.67488e-221	1	MKI67
BIRC5	1.97793e-221	3.66551	0.697	0.061	4.98239e-217	1	BIRC5
PBK	2.40127e-219	3.81668	0.662	0.049	6.0488e-215	1	PBK
RRM2	2.94302e-212	3.85687	0.668	0.056	7.41348e-208	1	RRM2
CDC20	1.90954e-208	3.79992	0.693	0.074	4.81013e-204	1	CDC20
ASPM	7.1333e-208	3.69647	0.682	0.063	1.79688e-203	1	ASPM
CEP55	1.83578e-206	3.53936	0.629	0.046	4.62433e-202	1	CEP55
TPX2	1.06749e-201	3.29802	0.738	0.103	2.68901e-197	1	TPX2
KIF20B	1.43297e-201	3.03262	0.795	0.136	3.60964e-197	1	KIF20B
TYMS	1.4607e-199	2.86095	0.816	0.158	3.67951e-195	1	TYMS
MAD2L1	3.84484e-199	2.55885	0.752	0.107	9.68516e-195	1	MAD2L1
CCNA2	2.15856e-193	3.94958	0.578	0.036	5.43742e-189	1	CCNA2
CCNB1	7.58105e-186	3.40627	0.645	0.072	1.90967e-181	1	CCNB1
TK1	2.83683e-184	2.66846	0.758	0.133	7.14599e-180	1	TK1
CENPF	8.30441e-183	3.04059	0.76	0.135	2.09188e-178	1	CENPF
ANLN	2.22562e-177	2.97208	0.771	0.16	5.60634e-173	1	ANLN
CLSPN	6.23893e-175	3.51577	0.631	0.072	1.57159e-170	1	CLSPN
HMMR	2.53356e-171	3.77515	0.535	0.037	6.38205e-167	1	HMMR
HMGB2	4.32905e-170	2.75512	0.846	0.244	1.09049e-165	1	HMGB2
HELLS	4.77301e-170	2.52774	0.848	0.233	1.20232e-165	1	HELLS
SMC4	1.24619e-169	2.35148	0.916	0.365	3.13915e-165	1	SMC4
CDKN3	1.01794e-166	3.24231	0.564	0.053	2.56419e-162	1	CDKN3
TUBA1B	3.52729e-166	1.69293	0.986	0.746	8.88524e-162	1	TUBA1B
STMN1	1.42569e-163	2.20199	0.863	0.244	3.59131e-159	1	STMN1
PTTG1	2.77346e-163	3.36831	0.625	0.083	6.98635e-159	1	PTTG1
CDCA5	9.94279e-163	3.31231	0.488	0.027	2.50459e-158	1	CDCA5
CDK1	2.28172e-162	2.92352	0.6	0.067	5.74765e-158	1	CDK1
BUB1	1.6124e-160	3.5357	0.469	0.023	4.06165e-156	1	BUB1
BRCA2	4.50428e-158	2.45445	0.635	0.087	1.13463e-153	1	BRCA2
SGO2	6.49979e-158	3.69517	0.5	0.036	1.6373e-153	1	SGO2
KIF2C	1.72249e-157	4.32502	0.432	0.015	4.33895e-153	1	KIF2C
SPC25	1.81357e-157	3.75959	0.426	0.012	4.56839e-153	1	SPC25
NCAPG	1.23709e-155	2.88653	0.482	0.03	3.11623e-151	1	NCAPG
RFC3	1.85662e-154	2.60824	0.592	0.07	4.67683e-150	1	RFC3
IQGAP3	6.12188e-154	2.73539	0.557	0.056	1.5421e-149	1	IQGAP3
LMNB1	1.27425e-152	2.31839	0.723	0.15	3.20983e-148	1	LMNB1
DLGAP5	9.65501e-152	3.72599	0.461	0.026	2.4321e-147	1	DLGAP5
KIF11	1.09155e-151	2.96529	0.555	0.061	2.74961e-147	1	KIF11
ZWINT	2.50413e-151	2.55978	0.613	0.084	6.30791e-147	1	ZWINT
UBE2T	1.67537e-150	2.63127	0.668	0.12	4.22025e-146	1	UBE2T
DEK	2.45543e-150	1.40236	0.984	0.748	6.18522e-146	1	DEK
CENPE	3.78397e-150	3.13668	0.576	0.073	9.53183e-146	1	CENPE
ATAD2	6.05607e-149	2.33214	0.76	0.177	1.52552e-144	1	ATAD2
PTMA	1.30129e-148	0.923321	1	0.975	3.27795e-144	1	PTMA
HMGB1	3.35976e-147	1.14277	0.998	0.899	8.46323e-143	1	HMGB1
DHFR	4.09612e-146	2.18667	0.824	0.259	1.03181e-141	1	DHFR
H2AFZ	1.21337e-145	1.68113	0.957	0.614	3.05649e-141	1	H2AFZ
DEPDC1	6.29808e-145	3.85822	0.434	0.023	1.58649e-140	1	DEPDC1
SAPCD2	8.71189e-145	3.03826	0.598	0.088	2.19452e-140	1	SAPCD2
PLK1	1.13719e-144	3.67366	0.439	0.025	2.86458e-140	1	PLK1
NUSAP1	2.0291e-143	2.62042	0.582	0.08	5.1113e-139	1	NUSAP1
UBE2C	2.24268e-143	2.6699	0.492	0.042	5.64932e-139	1	UBE2C
SMC2	3.03516e-143	2.02875	0.711	0.147	7.64557e-139	1	SMC2
CENPW	3.82232e-143	2.77507	0.52	0.053	9.62842e-139	1	CENPW
ORC6	5.41986e-143	2.82148	0.51	0.05	1.36526e-138	1	ORC6
TACC3	7.8956e-143	2.85366	0.543	0.062	1.9889e-138	1	TACC3
GTSE1	8.41547e-143	3.1279	0.451	0.029	2.11986e-138	1	GTSE1
FANCI	1.24076e-140	2.33652	0.572	0.076	3.12547e-136	1	FANCI
KIF23	1.75843e-139	3.46719	0.463	0.036	4.42948e-135	1	KIF23
NCAPD2	4.12186e-139	3.31065	0.594	0.097	1.0383e-134	1	NCAPD2
NEK2	4.13313e-139	3.41074	0.416	0.02	1.04113e-134	1	NEK2
BRCA1	4.20324e-139	2.54542	0.584	0.083	1.0588e-134	1	BRCA1
ATAD5	8.51019e-138	2.35643	0.584	0.083	2.14372e-133	1	ATAD5
CDCA8	1.41632e-137	3.30157	0.521	0.06	3.5677e-133	1	CDCA8
KIF4A	7.50424e-136	2.58951	0.479	0.041	1.89032e-131	1	KIF4A
CDCA2	1.00056e-135	3.78693	0.396	0.018	2.5204e-131	1	CDCA2
RACGAP1	2.08927e-135	2.58889	0.523	0.062	5.26286e-131	1	RACGAP1
NDC80	2.09594e-134	3.67455	0.406	0.02	5.27967e-130	1	NDC80
HMGN2	2.67949e-134	1.65884	0.992	0.752	6.74963e-130	1	HMGN2
ESCO2	2.02307e-133	2.9405	0.48	0.046	5.09611e-129	1	ESCO2
KIF14	1.27527e-130	3.41289	0.387	0.018	3.2124e-126	1	KIF14
KIF15	7.23056e-129	3.25847	0.389	0.019	1.82138e-124	1	KIF15
RRM1	1.00727e-128	1.93409	0.758	0.214	2.5373e-124	1	RRM1
FOXM1	3.94073e-127	2.3519	0.492	0.057	9.92671e-123	1	FOXM1
AURKB	4.78289e-126	3.25212	0.393	0.023	1.20481e-121	1	AURKB
SGO1	5.68479e-126	2.61562	0.439	0.036	1.432e-121	1	SGO1
CCNB2	1.04313e-125	2.57978	0.469	0.05	2.62764e-121	1	CCNB2
DNMT1	1.04766e-125	1.73321	0.844	0.319	2.63905e-121	1	DNMT1
ASF1B	4.80715e-124	3.36586	0.461	0.047	1.21092e-119	1	ASF1B
MCM10	2.94935e-123	3.46598	0.418	0.032	7.42942e-119	1	MCM10
KIFC1	1.23994e-122	2.7264	0.389	0.023	3.12341e-118	1	KIFC1
PCLAF	1.47862e-122	1.77963	0.615	0.117	3.72464e-118	1	PCLAF
HJURP	1.89457e-122	3.78219	0.344	0.011	4.77243e-118	1	HJURP
PRR11	9.58281e-122	2.90588	0.457	0.048	2.41391e-117	1	PRR11
TTK	7.6591e-121	2.67577	0.385	0.023	1.92933e-116	1	TTK
LIG1	1.58504e-120	2.25224	0.613	0.122	3.9927e-116	1	LIG1
MCM7	2.54132e-120	1.82269	0.77	0.247	6.40158e-116	1	MCM7
PRC1	2.29691e-119	2.24199	0.496	0.065	5.78592e-115	1	PRC1
MCM4	6.2732e-119	1.73312	0.752	0.213	1.58022e-114	1	MCM4
RAD51AP1	1.02611e-118	2.70219	0.451	0.047	2.58477e-114	1	RAD51AP1
NUF2	5.60392e-118	2.62942	0.387	0.026	1.41163e-113	1	NUF2
BUB1B	8.68371e-118	3.22574	0.365	0.02	2.18743e-113	1	BUB1B
KNL1	2.02186e-117	1.88556	0.41	0.034	5.09307e-113	1	KNL1
CDT1	3.1293e-117	2.96656	0.496	0.072	7.88272e-113	1	CDT1
CHEK1	1.98702e-115	2.1638	0.578	0.111	5.00531e-111	1	CHEK1
CENPU	9.42176e-114	2.60764	0.5	0.072	2.37334e-109	1	CENPU
ECT2	1.177e-113	1.77711	0.826	0.351	2.96487e-109	1	ECT2
MCM2	1.21645e-113	2.18294	0.592	0.118	3.06425e-109	1	MCM2
SKA3	1.3437e-113	3.2474	0.381	0.028	3.38479e-109	1	SKA3
NCAPD3	1.65491e-113	1.89064	0.598	0.123	4.16873e-109	1	NCAPD3
VRK1	3.13477e-113	1.96996	0.59	0.116	7.89648e-109	1	VRK1
CDC6	2.68031e-112	2.47843	0.57	0.114	6.75171e-108	1	CDC6
UHRF1	3.82696e-112	2.68524	0.457	0.058	9.64011e-108	1	UHRF1
FEN1	8.69381e-112	2.29454	0.539	0.091	2.18997e-107	1	FEN1
CKS1B	3.89176e-111	1.68815	0.773	0.287	9.80335e-107	1	CKS1B
HSPD1	1.43181e-110	1.04031	0.992	0.856	3.60672e-106	1	HSPD1
SPAG5	3.37153e-109	3.83625	0.342	0.02	8.49288e-105	1	SPAG5
DTYMK	4.26246e-109	2.17224	0.668	0.184	1.07371e-104	1	DTYMK
DEPDC1B	4.48238e-108	2.68885	0.457	0.062	1.12911e-103	1	DEPDC1B
DSCC1	8.10957e-108	2.52894	0.35	0.022	2.0428e-103	1	DSCC1
DIAPH3	1.87063e-107	2.22989	0.422	0.046	4.71212e-103	1	DIAPH3
SHCBP1	3.25459e-107	4.12179	0.322	0.015	8.19831e-103	1	SHCBP1
CENPK	3.5416e-107	2.63917	0.432	0.052	8.9213e-103	1	CENPK
NUCKS1	1.69685e-106	1.18586	0.975	0.769	4.27438e-102	1	NUCKS1
RANBP1	2.03254e-105	1.45729	0.908	0.562	5.11998e-101	1	RANBP1
AURKA	1.70179e-104	2.91426	0.43	0.056	4.28682e-100	1	AURKA
CHTF18	2.60031e-103	1.69084	0.477	0.072	6.55018e-99	1	CHTF18
TMPO	1.64827e-102	1.34173	0.928	0.516	4.152e-98	1	TMPO
FANCD2	1.7734e-102	2.45671	0.42	0.051	4.46721e-98	1	FANCD2
CENPH	6.00588e-102	2.2057	0.477	0.074	1.51288e-97	1	CENPH
CKAP2L	2.19446e-101	4.40572	0.301	0.013	5.52784e-97	1	CKAP2L
ARHGAP11A	1.03456e-100	2.03237	0.381	0.039	2.60605e-96	1	ARHGAP11A
CDCA3	2.08071e-100	2.65709	0.355	0.029	5.24132e-96	1	CDCA3
CDC45	3.91106e-100	3.58706	0.312	0.016	9.85195e-96	1	CDC45
CIT	4.39396e-100	2.96136	0.35	0.028	1.10684e-95	1	CIT
PCNA	4.35056e-99	1.71693	0.836	0.414	1.09591e-94	1	PCNA
MELK	2.92919e-98	1.87052	0.404	0.049	7.37863e-94	1	MELK
POLQ	5.42368e-98	2.67475	0.324	0.022	1.36623e-93	1	POLQ
UBE2S	8.42631e-98	1.88783	0.754	0.303	2.12259e-93	1	UBE2S
KIF22	6.58355e-97	1.894	0.523	0.107	1.6584e-92	1	KIF22
TROAP	9.05336e-97	2.80763	0.342	0.028	2.28054e-92	1	TROAP
GINS1	2.33011e-96	2.32656	0.393	0.045	5.86954e-92	1	GINS1
RECQL4	4.50069e-96	2.14855	0.383	0.042	1.13372e-91	1	RECQL4
CKAP2	6.38595e-96	2.37241	0.564	0.139	1.60862e-91	1	CKAP2
NUDT1	3.01121e-95	1.91793	0.463	0.075	7.58523e-91	1	NUDT1
KIF18B	3.07389e-95	3.33716	0.287	0.013	7.74313e-91	1	KIF18B
PKMYT1	3.56015e-94	2.90831	0.314	0.022	8.96803e-90	1	PKMYT1
DTL	3.69415e-93	2.18113	0.402	0.054	9.30556e-89	1	DTL
ZWILCH	4.71698e-93	1.84583	0.525	0.109	1.18821e-88	1	ZWILCH
MCM3	7.08012e-93	1.80301	0.734	0.271	1.78348e-88	1	MCM3
CIP2A	7.93945e-93	2.76076	0.365	0.04	1.99995e-88	1	CIP2A
CENPN	2.21539e-92	1.99908	0.488	0.096	5.58058e-88	1	CENPN
KIF20A	3.58202e-92	5.42505	0.254	0.007	9.0231e-88	1	KIF20A
NDC1	3.63385e-91	1.64007	0.66	0.203	9.15366e-87	1	NDC1
MYBL2	3.89649e-91	1.56819	0.373	0.041	9.81526e-87	1	MYBL2
NCAPH	4.09313e-91	2.69081	0.297	0.018	1.03106e-86	1	NCAPH
NASP	5.99121e-91	1.21406	0.926	0.572	1.50919e-86	1	NASP
NCAPG2	1.51352e-90	2.44997	0.396	0.053	3.81257e-86	1	NCAPG2
TUBB	7.83662e-90	1.01048	0.941	0.695	1.97405e-85	1	TUBB
CKS2	1.07891e-89	1.86777	0.707	0.283	2.71778e-85	1	CKS2
POLE3	2.06552e-89	1.56933	0.781	0.336	5.20304e-85	1	POLE3
LMNB2	7.23658e-89	1.75603	0.672	0.232	1.8229e-84	1	LMNB2
DNAJC9	5.15422e-88	1.73245	0.619	0.182	1.29835e-83	1	DNAJC9
HNRNPAB	3.87864e-87	1.00897	0.975	0.713	9.77029e-83	1	HNRNPAB
MIS18A	7.83496e-87	2.44162	0.467	0.091	1.97363e-82	1	MIS18A
HIST1H4C	5.74013e-86	2.05304	0.877	0.548	1.44594e-81	1	HIST1H4C
RAN	1.89515e-84	0.992893	0.945	0.722	4.77388e-80	1	RAN
MMS22L	2.35898e-84	1.71354	0.525	0.126	5.94226e-80	1	MMS22L
ANP32E	5.01559e-84	1.36749	0.842	0.415	1.26343e-79	1	ANP32E
CENPA	5.93164e-84	3.3819	0.273	0.017	1.49418e-79	1	CENPA
PLK4	6.19015e-84	3.27774	0.293	0.023	1.5593e-79	1	PLK4
SMC1A	3.44735e-83	1.14925	0.936	0.623	8.68388e-79	1	SMC1A
RPA3	5.0274e-83	1.393	0.695	0.257	1.2664e-78	1	RPA3
ITGB3BP	1.28273e-82	1.63585	0.475	0.101	3.23119e-78	1	ITGB3BP
XRCC2	2.27922e-82	3.061	0.316	0.032	5.74136e-78	1	XRCC2
PARP1	2.41974e-82	1.04762	0.912	0.575	6.09532e-78	1	PARP1
CSE1L	3.12065e-82	1.682	0.725	0.279	7.86092e-78	1	CSE1L
PA2G4	3.6699e-81	0.964183	0.953	0.712	9.24449e-77	1	PA2G4
GINS2	4.42497e-81	2.7468	0.377	0.058	1.11465e-76	1	GINS2
PRKDC	5.06384e-81	0.997773	0.932	0.656	1.27558e-76	1	PRKDC
WDHD1	8.34656e-81	1.90796	0.391	0.062	2.1025e-76	1	WDHD1
CHAF1A	1.0751e-80	1.73151	0.475	0.101	2.70818e-76	1	CHAF1A
ANP32B	1.32924e-80	1.07676	0.934	0.653	3.34836e-76	1	ANP32B
KNTC1	1.93129e-80	2.09283	0.396	0.065	4.86492e-76	1	KNTC1
CDCA7	1.12284e-79	1.45619	0.691	0.258	2.82842e-75	1	CDCA7
KPNA2	1.54029e-79	1.80043	0.637	0.222	3.87999e-75	1	KPNA2
CMSS1	1.12675e-78	1.50906	0.742	0.322	2.83829e-74	1	CMSS1
MCM5	1.29096e-78	1.90507	0.533	0.143	3.25194e-74	1	MCM5
BUB3	1.61496e-78	1.14056	0.83	0.434	4.06809e-74	1	BUB3
CENPM	7.81889e-78	2.02595	0.494	0.118	1.96958e-73	1	CENPM
CEP78	3.66471e-76	1.4578	0.627	0.211	9.23141e-72	1	CEP78
TTF2	1.52459e-75	1.38808	0.602	0.19	3.84044e-71	1	TTF2
SPDL1	3.50704e-75	1.71832	0.547	0.152	8.83424e-71	1	SPDL1
NPM1	4.15299e-75	0.803583	0.984	0.823	1.04614e-70	1	NPM1
FAM83D	4.48189e-75	1.48336	0.32	0.04	1.12899e-70	1	FAM83D
NMU	6.50176e-75	2.13517	0.408	0.079	1.63779e-70	1	NMU
ZNF367	1.10962e-74	2.73696	0.328	0.044	2.79512e-70	1	ZNF367
CENPX	1.28104e-74	1.27776	0.783	0.379	3.22694e-70	1	CENPX
BLM	7.4601e-74	1.88962	0.316	0.039	1.8792e-69	1	BLM
DBF4	8.41118e-74	1.44033	0.652	0.241	2.11878e-69	1	DBF4
TMEM106C	1.13205e-73	1.22977	0.678	0.254	2.85164e-69	1	TMEM106C
STIL	1.65652e-73	2.40961	0.396	0.075	4.17276e-69	1	STIL
FANCA	5.72145e-73	1.93002	0.473	0.114	1.44123e-68	1	FANCA
PARPBP	9.52556e-73	1.70248	0.334	0.047	2.39949e-68	1	PARPBP
MCM6	1.66671e-72	1.71979	0.613	0.218	4.19845e-68	1	MCM6
MND1	2.34696e-72	2.73655	0.295	0.033	5.91199e-68	1	MND1
RAD21	2.47643e-72	1.18501	0.945	0.716	6.23812e-68	1	RAD21
GGCT	2.67547e-72	1.28549	0.812	0.418	6.7395e-68	1	GGCT
TIMELESS	6.68316e-72	1.78189	0.512	0.135	1.68349e-67	1	TIMELESS
PSAT1	7.22698e-72	1.59387	0.691	0.283	1.82048e-67	1	PSAT1
TFDP1	8.60978e-72	1.18841	0.803	0.4	2.1688e-67	1	TFDP1
POC1A	9.71978e-72	2.93268	0.266	0.024	2.44841e-67	1	POC1A
MZT1	2.21034e-71	1.59658	0.598	0.206	5.56784e-67	1	MZT1
SSRP1	4.47841e-71	1.13683	0.84	0.475	1.12811e-66	1	SSRP1
SUPT16H	1.04323e-70	1.10497	0.889	0.537	2.6279e-66	1	SUPT16H
GMNN	1.12628e-70	1.25982	0.637	0.224	2.83709e-66	1	GMNN
CENPJ	1.14171e-70	2.10184	0.346	0.054	2.87596e-66	1	CENPJ
POLE2	2.82278e-70	2.41716	0.297	0.036	7.11058e-66	1	POLE2
H2AFV	7.37542e-70	0.944988	0.898	0.572	1.85787e-65	1	H2AFV
NCL	1.11154e-69	0.838901	0.992	0.857	2.79996e-65	1	NCL
FBL	4.57086e-69	0.965334	0.91	0.583	1.1514e-64	1	FBL
CCNF	4.68193e-69	2.66392	0.273	0.028	1.17938e-64	1	CCNF
FAM111B	1.415e-68	2.73669	0.271	0.029	3.56437e-64	1	FAM111B
SHMT2	1.74141e-68	1.40471	0.654	0.254	4.38661e-64	1	SHMT2
PSIP1	2.04414e-68	1.19977	0.758	0.349	5.14918e-64	1	PSIP1
NUP107	5.67058e-68	1.41605	0.557	0.168	1.42842e-63	1	NUP107
KIF18A	1.25322e-67	2.15139	0.342	0.057	3.15687e-63	1	KIF18A
CDCA4	1.33325e-67	2.07312	0.406	0.087	3.35845e-63	1	CDCA4
DDX39A	1.35862e-67	1.21523	0.656	0.245	3.42236e-63	1	DDX39A
NSD2	1.63571e-67	1.15715	0.744	0.338	4.12034e-63	1	NSD2
HSP90AA1	3.03937e-67	0.591247	1	0.963	7.65616e-63	1	HSP90AA1
BCL2L12	1.04921e-66	1.51912	0.467	0.118	2.64296e-62	1	BCL2L12
PAICS	2.10601e-66	1.01439	0.852	0.489	5.30505e-62	1	PAICS
TUBG1	2.67873e-66	1.87139	0.465	0.124	6.74772e-62	1	TUBG1
CBX3	3.51005e-66	0.671455	0.971	0.773	8.84182e-62	1	CBX3
LYAR	4.2343e-66	1.44936	0.656	0.268	1.06662e-61	1	LYAR
YBX1	1.05269e-65	0.66788	0.99	0.855	2.65173e-61	1	YBX1
EZH2	6.69701e-65	1.31774	0.725	0.325	1.68698e-60	1	EZH2
SNRPD1	9.16407e-65	0.951347	0.893	0.596	2.30843e-60	1	SNRPD1
HMGB3	1.60855e-64	1.02645	0.641	0.244	4.05193e-60	1	HMGB3
WDR90	1.55927e-63	2.07985	0.406	0.093	3.9278e-59	1	WDR90
LSM5	3.55183e-63	1.09273	0.766	0.388	8.94705e-59	1	LSM5
SNRPF	9.25331e-63	0.844958	0.908	0.626	2.33091e-58	1	SNRPF
HSPE1	1.26265e-62	0.767864	0.969	0.79	3.18062e-58	1	HSPE1
GAS2L3	1.29433e-62	2.51664	0.295	0.044	3.26043e-58	1	GAS2L3
PPIH	1.30278e-62	1.27615	0.514	0.155	3.28169e-58	1	PPIH
PHF19	1.51477e-62	1.68488	0.422	0.1	3.81571e-58	1	PHF19
SLBP	1.53968e-62	1.32542	0.738	0.366	3.87846e-58	1	SLBP
SASS6	2.4935e-62	2.08732	0.365	0.074	6.28113e-58	1	SASS6
PTGES3	5.13892e-62	0.73701	0.963	0.772	1.29449e-57	1	PTGES3
SIVA1	5.27499e-62	1.08496	0.766	0.403	1.32877e-57	1	SIVA1
TFAM	7.34527e-62	1.06438	0.793	0.415	1.85027e-57	1	TFAM
USP1	7.56322e-62	1.01752	0.76	0.368	1.90517e-57	1	USP1
LSM4	9.82006e-62	0.831611	0.898	0.593	2.47367e-57	1	LSM4
MCM8	1.31962e-61	1.4958	0.338	0.061	3.32413e-57	1	MCM8
CD3EAP	4.4694e-61	1.30032	0.627	0.237	1.12584e-56	1	CD3EAP
TOPBP1	1.15606e-60	1.16816	0.602	0.232	2.9121e-56	1	TOPBP1
TCOF1	1.29657e-60	1.05551	0.762	0.363	3.26606e-56	1	TCOF1
INCENP	4.93595e-60	1.97854	0.328	0.061	1.24337e-55	1	INCENP
GAL	6.53296e-60	1.07228	0.594	0.215	1.64565e-55	1	GAL
TRIP13	9.88301e-60	1.39543	0.41	0.099	2.48953e-55	1	TRIP13
C1QBP	1.48957e-59	0.872689	0.928	0.652	3.75222e-55	1	C1QBP
RFC2	1.6016e-59	1.55032	0.396	0.095	4.03443e-55	1	RFC2
ENO1	2.61744e-59	0.668338	0.982	0.854	6.59333e-55	1	ENO1
H2AFX	2.77166e-59	1.04277	0.668	0.282	6.98181e-55	1	H2AFX
RFC4	7.18391e-59	1.69453	0.305	0.05	1.80963e-54	1	RFC4
CDC25A	8.03968e-59	2.83527	0.26	0.034	2.0252e-54	1	CDC25A
NHP2	4.33609e-58	1.02401	0.834	0.476	1.09226e-53	1	NHP2
TCF19	4.60072e-58	2.81773	0.254	0.033	1.15892e-53	1	TCF19
RBL1	7.86678e-58	1.9897	0.369	0.084	1.98164e-53	1	RBL1
NME1	7.93585e-58	0.898705	0.824	0.469	1.99904e-53	1	NME1
GPSM2	1.19432e-57	1.76806	0.465	0.14	3.0085e-53	1	GPSM2
NAP1L1	1.26391e-57	0.706979	0.92	0.66	3.1838e-53	1	NAP1L1
RFWD3	1.47275e-57	1.6037	0.449	0.123	3.70987e-53	1	RFWD3
BRIP1	2.96005e-57	2.06961	0.256	0.034	7.45636e-53	1	BRIP1
PPIA	7.13568e-57	0.436003	0.988	0.898	1.79748e-52	1	PPIA
SERBP1	1.24921e-56	0.617985	0.979	0.851	3.14677e-52	1	SERBP1
RPA2	1.55728e-56	1.29038	0.49	0.158	3.9228e-52	1	RPA2
NUP85	3.16963e-56	1.25853	0.537	0.182	7.98431e-52	1	NUP85
LRRCC1	4.32825e-56	1.45032	0.473	0.142	1.09029e-51	1	LRRCC1
CDK5RAP2	5.51982e-56	1.37417	0.527	0.184	1.39044e-51	1	CDK5RAP2
NUDT15	5.65697e-56	1.51128	0.578	0.223	1.42499e-51	1	NUDT15
NOP56	1.57242e-55	0.771499	0.918	0.65	3.96094e-51	1	NOP56
RANGAP1	1.6331e-55	1.00571	0.721	0.351	4.11379e-51	1	RANGAP1
WDR76	1.84347e-55	2.13426	0.279	0.044	4.64371e-51	1	WDR76
RBBP7	3.81904e-55	0.854938	0.889	0.598	9.62017e-51	1	RBBP7
RAD18	4.11718e-55	1.81387	0.355	0.079	1.03712e-50	1	RAD18
ALYREF	5.06363e-55	1.09356	0.74	0.388	1.27553e-50	1	ALYREF
SET	5.83992e-55	0.592378	0.982	0.833	1.47108e-50	1	SET
DUT	7.32659e-55	1.10981	0.662	0.291	1.84557e-50	1	DUT
SNRPB	9.06848e-55	0.742022	0.906	0.645	2.28435e-50	1	SNRPB
RFC1	1.07782e-54	0.900257	0.789	0.436	2.71504e-50	1	RFC1
SNRPG	1.93065e-54	0.670341	0.916	0.641	4.86331e-50	1	SNRPG
POLD2	2.15432e-54	0.90892	0.77	0.392	5.42674e-50	1	POLD2
CDK4	3.76629e-54	1.31673	0.641	0.282	9.48729e-50	1	CDK4
GGH	4.37557e-54	1.4328	0.355	0.08	1.10221e-49	1	GGH
MYO19	5.63799e-54	1.22012	0.615	0.26	1.42021e-49	1	MYO19
CBX5	6.7197e-54	1.07723	0.711	0.347	1.69269e-49	1	CBX5
THOC3	7.67235e-54	1.3121	0.541	0.195	1.93267e-49	1	THOC3
PPM1G	9.16314e-54	0.87967	0.873	0.569	2.3082e-49	1	PPM1G
C9orf40	1.08065e-53	1.78758	0.32	0.065	2.72217e-49	1	C9orf40
FABP5	1.33023e-53	0.982597	0.812	0.483	3.35084e-49	1	FABP5
RPSA	1.63595e-53	0.578336	0.988	0.886	4.12095e-49	1	RPSA
BARD1	3.9084e-53	1.25112	0.469	0.148	9.84526e-49	1	BARD1
HNRNPM	6.66817e-53	0.729488	0.951	0.716	1.67971e-48	1	HNRNPM
MSH2	9.53152e-53	1.18861	0.523	0.185	2.40099e-48	1	MSH2
SKA2	1.46235e-52	1.23557	0.607	0.265	3.68366e-48	1	SKA2
TUBB4B	2.1061e-52	0.844442	0.924	0.695	5.30527e-48	1	TUBB4B
GSTCD	2.1718e-52	1.18717	0.459	0.138	5.47077e-48	1	GSTCD
HAT1	4.80992e-52	1.25254	0.541	0.199	1.21162e-47	1	HAT1
TMEM97	4.9549e-52	1.08416	0.623	0.27	1.24814e-47	1	TMEM97
PAXX	5.83699e-52	1.10233	0.697	0.332	1.47034e-47	1	PAXX
HIST1H2AG	6.43722e-52	1.41622	0.262	0.04	1.62154e-47	1	HIST1H2AG
C19orf48	7.04342e-52	1.12414	0.607	0.246	1.77424e-47	1	C19orf48
TOMM40	7.08358e-52	0.918491	0.756	0.381	1.78435e-47	1	TOMM40
SKP2	1.16761e-51	1.61654	0.359	0.088	2.9412e-47	1	SKP2
HSPA8	1.29729e-51	0.645672	0.986	0.882	3.26786e-47	1	HSPA8
NT5DC2	2.15777e-51	1.13526	0.459	0.141	5.43542e-47	1	NT5DC2
MRPL37	2.78616e-51	0.891922	0.701	0.328	7.01833e-47	1	MRPL37
DKC1	4.79326e-51	0.78643	0.873	0.53	1.20742e-46	1	DKC1
TRAP1	8.0847e-51	1.05272	0.783	0.416	2.03654e-46	1	TRAP1
LRR1	8.32637e-51	2.37963	0.258	0.042	2.09741e-46	1	LRR1
CCT2	1.04327e-50	0.808314	0.893	0.602	2.628e-46	1	CCT2
MASTL	1.3903e-50	1.7363	0.344	0.08	3.50217e-46	1	MASTL
MIS18BP1	1.84142e-50	1.19667	0.652	0.303	4.63854e-46	1	MIS18BP1
MTHFD1	3.62439e-50	1.18284	0.643	0.293	9.12984e-46	1	MTHFD1
SLC12A2	3.75691e-50	0.759625	0.977	0.734	9.46367e-46	1	SLC12A2
RIF1	5.14644e-50	0.873621	0.863	0.538	1.29639e-45	1	RIF1
WDR34	1.28193e-49	0.949929	0.744	0.384	3.22918e-45	1	WDR34
CCNE2	2.90881e-49	1.76924	0.268	0.047	7.32729e-45	1	CCNE2
NOLC1	3.56603e-49	0.765929	0.891	0.588	8.98282e-45	1	NOLC1
MAZ	6.99914e-49	0.611194	0.777	0.411	1.76308e-44	1	MAZ
DSN1	8.18615e-49	1.47935	0.398	0.112	2.06209e-44	1	DSN1
MAP3K20	9.06523e-49	1.06127	0.672	0.313	2.28353e-44	1	MAP3K20
NAA38	1.36701e-48	0.952133	0.811	0.505	3.4435e-44	1	NAA38
RFC5	1.56192e-48	1.64289	0.309	0.067	3.93446e-44	1	RFC5
CDK2	1.59787e-48	1.12531	0.379	0.101	4.02503e-44	1	CDK2
SNRPA	1.72609e-48	1.07597	0.664	0.302	4.34801e-44	1	SNRPA
MLEC	1.73899e-48	0.785484	0.922	0.686	4.38051e-44	1	MLEC
NUP155	2.84987e-48	1.28646	0.488	0.171	7.17882e-44	1	NUP155
EIF5A	3.04157e-48	0.62707	0.965	0.789	7.66171e-44	1	EIF5A
LSM3	4.2332e-48	0.610743	0.748	0.415	1.06634e-43	1	LSM3
PLP2	5.8674e-48	0.854132	0.844	0.528	1.478e-43	1	PLP2
SMC3	8.0927e-48	0.70957	0.822	0.465	2.03855e-43	1	SMC3
PRIM1	8.35237e-48	1.50511	0.283	0.056	2.10396e-43	1	PRIM1
DCTPP1	1.25282e-47	0.859556	0.75	0.401	3.15585e-43	1	DCTPP1
THOP1	1.43602e-47	1.39736	0.438	0.14	3.61733e-43	1	THOP1
FBXO5	1.47579e-47	1.65791	0.283	0.056	3.71751e-43	1	FBXO5
PFN1	1.5501e-47	0.574233	0.953	0.806	3.90469e-43	1	PFN1
CCT6A	1.79563e-47	0.660555	0.898	0.672	4.52318e-43	1	CCT6A
IMPDH2	2.20927e-47	0.875039	0.812	0.504	5.56515e-43	1	IMPDH2
NUP93	3.21677e-47	0.961951	0.424	0.13	8.10304e-43	1	NUP93
EIF4EBP1	3.37864e-47	0.987381	0.75	0.408	8.5108e-43	1	EIF4EBP1
TUBA1C	3.54779e-47	0.712965	0.918	0.661	8.93688e-43	1	TUBA1C
LBR	4.86411e-47	1.00451	0.732	0.403	1.22527e-42	1	LBR
KPNB1	4.95724e-47	0.687157	0.906	0.666	1.24873e-42	1	KPNB1
CKAP5	5.56474e-47	1.24183	0.641	0.32	1.40176e-42	1	CKAP5
PGP	5.84999e-47	1.12679	0.602	0.261	1.47361e-42	1	PGP
RPA1	9.28908e-47	1.24388	0.512	0.192	2.33992e-42	1	RPA1
CACYBP	9.36832e-47	0.7026	0.898	0.601	2.35988e-42	1	CACYBP
SAE1	1.04012e-46	1.20299	0.551	0.222	2.62007e-42	1	SAE1
IDH2	1.39302e-46	0.688908	0.842	0.522	3.50901e-42	1	IDH2
WBP11	2.06891e-46	0.863708	0.76	0.416	5.2116e-42	1	WBP11
CDC25B	2.25895e-46	0.871175	0.512	0.188	5.69031e-42	1	CDC25B
PHB2	2.34005e-46	0.889384	0.844	0.55	5.89458e-42	1	PHB2
SIGMAR1	2.62378e-46	0.929614	0.619	0.279	6.60931e-42	1	SIGMAR1
CHAF1B	3.00954e-46	1.82287	0.256	0.046	7.58104e-42	1	CHAF1B
CHEK2	3.22788e-46	1.31457	0.273	0.054	8.13103e-42	1	CHEK2
GPN3	6.57863e-46	1.14178	0.451	0.153	1.65716e-41	1	GPN3
ILF2	6.97049e-46	0.891156	0.771	0.464	1.75587e-41	1	ILF2
HLTF	1.13121e-45	1.05989	0.674	0.319	2.84952e-41	1	HLTF
ABCE1	1.17066e-45	0.841841	0.789	0.437	2.94888e-41	1	ABCE1
MRTO4	1.79751e-45	0.874263	0.68	0.332	4.52793e-41	1	MRTO4
POLE	1.8509e-45	1.53181	0.346	0.09	4.66241e-41	1	POLE
CCT5	5.30488e-45	0.690125	0.885	0.625	1.3363e-40	1	CCT5
SNRNP25	6.93498e-45	1.26194	0.459	0.163	1.74692e-40	1	SNRNP25
POLA1	8.43778e-45	1.61769	0.354	0.096	2.12548e-40	1	POLA1
ACOT7	8.44867e-45	0.743232	0.719	0.356	2.12822e-40	1	ACOT7
HIST1H1E	1.43266e-44	1.65423	0.406	0.132	3.60887e-40	1	HIST1H1E
CLPP	2.28436e-44	0.837139	0.654	0.324	5.7543e-40	1	CLPP
FKBP4	3.33005e-44	0.772517	0.898	0.62	8.3884e-40	1	FKBP4
RPL4	4.80694e-44	0.540398	0.982	0.832	1.21087e-39	1	RPL4
CYC1	8.39498e-44	0.687856	0.932	0.679	2.1147e-39	1	CYC1
SNRPD2	8.96989e-44	0.584337	0.93	0.704	2.25952e-39	1	SNRPD2
CCDC34	1.77853e-43	0.951389	0.512	0.202	4.4801e-39	1	CCDC34
PAQR4	1.98209e-43	1.90845	0.363	0.106	4.99288e-39	1	PAQR4
IL17RB	2.27788e-43	1.22583	0.391	0.119	5.73799e-39	1	IL17RB
CTNNAL1	2.71484e-43	1.07921	0.537	0.216	6.83868e-39	1	CTNNAL1
CCDC14	3.0103e-43	0.970966	0.582	0.251	7.58293e-39	1	CCDC14
TMEM109	9.42106e-43	0.998793	0.666	0.337	2.37316e-38	1	TMEM109
MRPS12	1.0132e-42	0.920725	0.727	0.41	2.55225e-38	1	MRPS12
SLF1	1.41028e-42	1.36064	0.375	0.114	3.55249e-38	1	SLF1
MRPS26	1.63771e-42	0.764973	0.777	0.446	4.12539e-38	1	MRPS26
PSMC3IP	1.86347e-42	1.84429	0.297	0.072	4.69407e-38	1	PSMC3IP
EIF1AX	2.59695e-42	0.561314	0.953	0.816	6.54171e-38	1	EIF1AX
MTHFD1L	2.66489e-42	0.989241	0.527	0.213	6.71285e-38	1	MTHFD1L
MT2A	3.59546e-42	0.580327	0.938	0.708	9.05697e-38	1	MT2A
TBCD	4.55561e-42	1.1401	0.463	0.169	1.14756e-37	1	TBCD
TRMT112	5.14195e-42	0.794505	0.83	0.514	1.29526e-37	1	TRMT112
KMT5A	5.35127e-42	0.841321	0.596	0.275	1.34798e-37	1	KMT5A
ANAPC11	6.587e-42	0.821683	0.799	0.522	1.65927e-37	1	ANAPC11
HAUS6	1.18387e-41	1.4941	0.426	0.146	2.98217e-37	1	HAUS6
POLD3	1.24121e-41	0.734281	0.666	0.315	3.1266e-37	1	POLD3
SNRNP40	1.46036e-41	1.00828	0.471	0.174	3.67864e-37	1	SNRNP40
CD320	1.59836e-41	1.01726	0.617	0.291	4.02627e-37	1	CD320
PRMT1	2.01349e-41	0.789041	0.801	0.475	5.07199e-37	1	PRMT1
EPHB2	2.30943e-41	0.905318	0.521	0.205	5.81747e-37	1	EPHB2
MRPL4	2.32538e-41	0.952566	0.748	0.436	5.85763e-37	1	MRPL4
CYCS	2.45456e-41	0.553842	0.947	0.73	6.18303e-37	1	CYCS
MORC4	3.48282e-41	0.942061	0.646	0.319	8.77324e-37	1	MORC4
SHMT1	3.8957e-41	1.38794	0.365	0.112	9.81327e-37	1	SHMT1
CCT3	4.02857e-41	0.622122	0.926	0.689	1.0148e-36	1	CCT3
MTHFD2	4.25261e-41	0.818869	0.84	0.569	1.07123e-36	1	MTHFD2
TRIM28	4.43263e-41	0.6875	0.861	0.543	1.11658e-36	1	TRIM28
F12	4.71487e-41	1.17948	0.459	0.169	1.18768e-36	1	F12
SAC3D1	6.46681e-41	1.34743	0.381	0.121	1.62899e-36	1	SAC3D1
HMG20B	7.24565e-41	0.972889	0.717	0.382	1.82518e-36	1	HMG20B
AHCY	8.43351e-41	0.716742	0.713	0.39	2.1244e-36	1	AHCY
RPS2	9.78792e-41	0.431156	0.998	0.952	2.46558e-36	1	RPS2
MRPL17	1.15853e-40	0.897632	0.693	0.375	2.91833e-36	1	MRPL17
SLC25A5	1.42263e-40	0.519779	0.916	0.748	3.58361e-36	1	SLC25A5
SLC1A5	1.84237e-40	0.856847	0.787	0.453	4.64093e-36	1	SLC1A5
GOT1	2.20087e-40	0.970601	0.506	0.201	5.544e-36	1	GOT1
MDC1	2.20797e-40	1.35886	0.291	0.071	5.56187e-36	1	MDC1
HSP90AB1	2.44742e-40	0.383994	0.992	0.929	6.16505e-36	1	HSP90AB1
G2E3	2.55049e-40	1.14899	0.479	0.188	6.42469e-36	1	G2E3
BRIX1	5.27588e-40	0.644264	0.695	0.355	1.32899e-35	1	BRIX1
XPO1	5.86607e-40	0.633517	0.875	0.601	1.47766e-35	1	XPO1
C8orf33	6.1786e-40	0.816301	0.816	0.533	1.55639e-35	1	C8orf33
HMGA1	7.77995e-40	0.560843	0.967	0.756	1.95977e-35	1	HMGA1
PRIM2	1.00265e-39	1.88769	0.305	0.079	2.52567e-35	1	PRIM2
POLR3K	1.42353e-39	1.09347	0.512	0.212	3.58588e-35	1	POLR3K
GRPEL1	1.5435e-39	0.791204	0.732	0.406	3.88806e-35	1	GRPEL1
C20orf27	1.73158e-39	0.895515	0.514	0.213	4.36186e-35	1	C20orf27
PARP2	1.90963e-39	1.43666	0.326	0.092	4.81035e-35	1	PARP2
DONSON	1.94739e-39	1.78848	0.268	0.062	4.90547e-35	1	DONSON
SLC43A3	2.16323e-39	1.49638	0.34	0.099	5.44917e-35	1	SLC43A3
ACYP1	3.23692e-39	1.28066	0.406	0.142	8.15381e-35	1	ACYP1
TEX30	5.50969e-39	1.12593	0.258	0.057	1.38789e-34	1	TEX30
RUVBL1	5.56196e-39	0.735752	0.736	0.395	1.40106e-34	1	RUVBL1
PGAM1	5.82533e-39	0.73398	0.857	0.576	1.4674e-34	1	PGAM1
NOP16	7.70555e-39	0.914802	0.596	0.274	1.94103e-34	1	NOP16
EBNA1BP2	7.75243e-39	0.718915	0.756	0.417	1.95284e-34	1	EBNA1BP2
LARS	8.28203e-39	0.751995	0.838	0.527	2.08624e-34	1	LARS
MYC	1.06052e-38	0.851052	0.785	0.459	2.67145e-34	1	MYC
HNRNPR	1.20727e-38	0.622401	0.902	0.663	3.04112e-34	1	HNRNPR
TAF15	1.35842e-38	0.594167	0.883	0.576	3.42186e-34	1	TAF15
PPAT	1.40935e-38	0.996652	0.605	0.286	3.55016e-34	1	PPAT
SRM	1.86617e-38	0.836233	0.676	0.361	4.70089e-34	1	SRM
PPIF	1.96947e-38	0.463161	0.693	0.361	4.96109e-34	1	PPIF
STIP1	2.09317e-38	0.720204	0.807	0.516	5.2727e-34	1	STIP1
NAA15	2.10974e-38	0.702216	0.756	0.44	5.31444e-34	1	NAA15
UNG	2.96355e-38	1.29084	0.477	0.197	7.46518e-34	1	UNG
RCC2	3.08004e-38	0.699762	0.789	0.459	7.75862e-34	1	RCC2
DDX21	3.34836e-38	0.597433	0.943	0.758	8.43453e-34	1	DDX21
MRPS34	3.69431e-38	0.773822	0.832	0.555	9.30597e-34	1	MRPS34
XRCC6	4.09584e-38	0.603422	0.906	0.644	1.03174e-33	1	XRCC6
RPS8	5.32368e-38	0.39926	0.996	0.954	1.34103e-33	1	RPS8
MAGOHB	5.49318e-38	1.0612	0.516	0.222	1.38373e-33	1	MAGOHB
RAD23A	5.72806e-38	0.798543	0.842	0.577	1.4429e-33	1	RAD23A
RPL22L1	5.8548e-38	0.836467	0.904	0.644	1.47482e-33	1	RPL22L1
GEN1	5.99492e-38	1.50074	0.336	0.099	1.51012e-33	1	GEN1
TPRKB	6.57351e-38	0.710798	0.52	0.223	1.65587e-33	1	TPRKB
TMA16	6.98775e-38	0.72784	0.768	0.454	1.76021e-33	1	TMA16
COMMD4	7.66514e-38	0.792235	0.561	0.253	1.93085e-33	1	COMMD4
TUFM	7.79766e-38	0.568842	0.92	0.674	1.96423e-33	1	TUFM
NCS1	1.62506e-37	1.66157	0.291	0.076	4.09352e-33	1	NCS1
CASP8AP2	1.87196e-37	1.04184	0.582	0.267	4.71548e-33	1	CASP8AP2
RNPS1	1.96124e-37	0.661309	0.855	0.588	4.94035e-33	1	RNPS1
METRN	2.09727e-37	0.816416	0.758	0.448	5.28303e-33	1	METRN
RPLP2	2.29132e-37	0.453852	0.994	0.939	5.77183e-33	1	RPLP2
TONSL	2.49936e-37	0.927566	0.365	0.118	6.2959e-33	1	TONSL
ERH	2.51964e-37	0.549603	0.855	0.605	6.34699e-33	1	ERH
HADH	4.16389e-37	0.653771	0.684	0.356	1.04888e-32	1	HADH
LRRC59	4.25452e-37	0.671368	0.83	0.522	1.07171e-32	1	LRRC59
C1orf35	4.48743e-37	0.825864	0.578	0.26	1.13038e-32	1	C1orf35
HINT1	6.62451e-37	0.575263	0.916	0.717	1.66871e-32	1	HINT1
EEF1B2	7.4862e-37	0.487155	0.977	0.841	1.88577e-32	1	EEF1B2
METTL26	9.56293e-37	0.724136	0.781	0.482	2.4089e-32	1	METTL26
NPM3	9.62892e-37	0.944302	0.568	0.265	2.42552e-32	1	NPM3
SLC25A39	1.90801e-36	0.603118	0.797	0.492	4.80626e-32	1	SLC25A39
HNRNPA2B1	2.1603e-36	0.436312	0.988	0.893	5.44181e-32	1	HNRNPA2B1
HMGN1	2.3312e-36	0.466244	0.963	0.814	5.8723e-32	1	HMGN1
SRPK1	2.41078e-36	0.595873	0.871	0.59	6.07276e-32	1	SRPK1
UCHL5	2.67991e-36	0.84112	0.619	0.317	6.7507e-32	1	UCHL5
GOT2	2.87857e-36	0.66847	0.756	0.436	7.25112e-32	1	GOT2
RBM28	2.92693e-36	0.622481	0.691	0.361	7.37295e-32	1	RBM28
HIRIP3	4.44925e-36	1.67411	0.291	0.079	1.12077e-31	1	HIRIP3
POP7	4.51444e-36	0.790015	0.604	0.299	1.13719e-31	1	POP7
IARS	4.69527e-36	0.696986	0.783	0.47	1.18274e-31	1	IARS
PNPT1	6.48626e-36	0.928401	0.559	0.256	1.63389e-31	1	PNPT1
ILF3	7.49816e-36	0.556448	0.875	0.596	1.88879e-31	1	ILF3
ASNS	1.05195e-35	1.09055	0.41	0.154	2.64986e-31	1	ASNS
BANF1	1.37508e-35	0.811837	0.768	0.487	3.46383e-31	1	BANF1
TIMM44	1.47143e-35	0.876289	0.65	0.334	3.70654e-31	1	TIMM44
SLFN13	1.57671e-35	1.13177	0.283	0.075	3.97174e-31	1	SLFN13
NAE1	1.63957e-35	0.807797	0.68	0.369	4.13008e-31	1	NAE1
HNRNPD	1.96879e-35	0.507071	0.914	0.71	4.95939e-31	1	HNRNPD
NUDT21	2.13316e-35	0.771068	0.713	0.403	5.37344e-31	1	NUDT21
CTPS1	2.14144e-35	0.978591	0.41	0.147	5.39428e-31	1	CTPS1
NABP2	2.14435e-35	0.845758	0.453	0.181	5.40163e-31	1	NABP2
ATAD3A	2.57395e-35	0.896644	0.434	0.163	6.48379e-31	1	ATAD3A
EXOSC8	2.59907e-35	0.922401	0.443	0.175	6.54705e-31	1	EXOSC8
MRE11	2.65811e-35	1.00563	0.438	0.167	6.69577e-31	1	MRE11
SNRPE	2.77689e-35	0.593574	0.822	0.559	6.99498e-31	1	SNRPE
PNO1	3.17214e-35	0.914948	0.557	0.259	7.99062e-31	1	PNO1
ODF2	3.19131e-35	1.11714	0.434	0.169	8.0389e-31	1	ODF2
RCC1	3.95578e-35	0.581977	0.646	0.332	9.96461e-31	1	RCC1
VSNL11	4.99591e-35	0.872133	0.701	0.378	1.25847e-30	1	VSNL1
RPL35	5.17876e-35	0.362709	0.996	0.948	1.30453e-30	1	RPL35
SLC25A19	6.29635e-35	1.54971	0.271	0.07	1.58605e-30	1	SLC25A19
KHSRP	8.40311e-35	0.63324	0.814	0.503	2.11674e-30	1	KHSRP
NAP1L4	1.00735e-34	0.748018	0.799	0.513	2.53751e-30	1	NAP1L4
RBM14	1.00835e-34	1.08496	0.508	0.222	2.54003e-30	1	RBM14
HNRNPA3	1.01693e-34	0.468509	0.949	0.747	2.56166e-30	1	HNRNPA3
RPS16	1.09334e-34	0.453945	0.99	0.913	2.75413e-30	1	RPS16
MT1E	1.17697e-34	0.366109	0.914	0.645	2.96479e-30	1	MT1E
GLO1	1.24194e-34	0.333721	0.84	0.571	3.12844e-30	1	GLO1
CLDN2	1.39172e-34	1.51235	0.281	0.078	3.50574e-30	1	CLDN2
PRELID1	1.39185e-34	0.666216	0.848	0.593	3.50607e-30	1	PRELID1
YEATS4	1.43283e-34	1.13617	0.541	0.254	3.60929e-30	1	YEATS4
DHX9	1.4697e-34	0.61102	0.805	0.5	3.70218e-30	1	DHX9
STOML2	1.48124e-34	0.690834	0.775	0.488	3.73124e-30	1	STOML2
TMEM160	1.52764e-34	0.579741	0.633	0.313	3.84812e-30	1	TMEM160
MRPL11	1.62411e-34	0.838199	0.582	0.288	4.09114e-30	1	MRPL11
ATP5MC1	1.75578e-34	0.614964	0.803	0.539	4.4228e-30	1	ATP5MC1
COPS3	1.98354e-34	0.87485	0.504	0.222	4.99655e-30	1	COPS3
SSX2IP	2.44187e-34	0.907773	0.48	0.203	6.15107e-30	1	SSX2IP
SYNCRIP	2.50333e-34	0.491905	0.912	0.685	6.30588e-30	1	SYNCRIP
SMPD4	3.92925e-34	0.830165	0.506	0.221	9.89778e-30	1	SMPD4
RBM17	4.9425e-34	0.423243	0.869	0.569	1.24502e-29	1	RBM17
HACD3	4.94289e-34	0.667655	0.865	0.598	1.24511e-29	1	HACD3
MZT2A	5.09566e-34	0.633826	0.834	0.553	1.2836e-29	1	MZT2A
DAZAP1	5.14376e-34	0.735405	0.711	0.402	1.29571e-29	1	DAZAP1
SUZ12	5.244e-34	0.668584	0.781	0.502	1.32096e-29	1	SUZ12
RUVBL2	5.66954e-34	0.814537	0.611	0.313	1.42816e-29	1	RUVBL2
NAA10	7.27295e-34	0.639898	0.877	0.602	1.83206e-29	1	NAA10
MYBBP1A	7.69604e-34	0.834807	0.459	0.187	1.93863e-29	1	MYBBP1A
NDUFAF8	8.15149e-34	0.661657	0.682	0.378	2.05336e-29	1	NDUFAF8
CCT8	8.23021e-34	0.59736	0.863	0.585	2.07319e-29	1	CCT8
EIF2S1	9.34101e-34	0.808534	0.699	0.399	2.353e-29	1	EIF2S1
CAD	1.02535e-33	0.828782	0.371	0.129	2.58285e-29	1	CAD
PPP1R14B	1.04972e-33	0.61766	0.855	0.608	2.64425e-29	1	PPP1R14B
NUDCD1	1.05724e-33	1.11857	0.48	0.203	2.66319e-29	1	NUDCD1
HSPA9	1.18069e-33	0.58394	0.914	0.677	2.97416e-29	1	HSPA9
COQ2	1.24324e-33	1.49855	0.346	0.117	3.13173e-29	1	COQ2
ICMT	1.30453e-33	0.764342	0.672	0.375	3.28611e-29	1	ICMT
CNTLN	1.31457e-33	1.16214	0.332	0.107	3.3114e-29	1	CNTLN
MRPL3	1.65893e-33	0.583469	0.77	0.466	4.17885e-29	1	MRPL3
HNRNPA1	1.86706e-33	0.459346	0.99	0.844	4.70312e-29	1	HNRNPA1
CCT4	1.94719e-33	0.536072	0.879	0.627	4.90497e-29	1	CCT4
PGAM5	2.08473e-33	1.01014	0.518	0.231	5.25143e-29	1	PGAM5
HPRT1	2.19051e-33	0.548674	0.646	0.34	5.51788e-29	1	HPRT1
TMEM14A	2.52907e-33	0.845788	0.6	0.299	6.37073e-29	1	TMEM14A
NR2C2AP	2.84621e-33	1.27198	0.334	0.108	7.16961e-29	1	NR2C2AP
MSH6	3.96442e-33	1.12688	0.539	0.267	9.98637e-29	1	MSH6
NUP188	4.34131e-33	0.76352	0.498	0.215	1.09357e-28	1	NUP188
TIMM13	4.69773e-33	0.580453	0.85	0.571	1.18336e-28	1	TIMM13
PRPS1	4.8103e-33	1.08275	0.391	0.144	1.21171e-28	1	PRPS1
BRI3BP	4.93395e-33	0.599976	0.807	0.506	1.24286e-28	1	BRI3BP
MRPS27	5.69507e-33	0.894916	0.566	0.27	1.43459e-28	1	MRPS27
NOC3L	6.4752e-33	0.911993	0.568	0.281	1.6311e-28	1	NOC3L
IPO5	6.87493e-33	0.673852	0.684	0.386	1.7318e-28	1	IPO5
MZT2B	8.1585e-33	0.595112	0.836	0.594	2.05513e-28	1	MZT2B
MRPL13	8.69266e-33	0.614987	0.758	0.448	2.18968e-28	1	MRPL13
TPI1	1.00973e-32	0.393771	0.957	0.797	2.54352e-28	1	TPI1
TIMM10	1.10054e-32	0.809481	0.508	0.231	2.77227e-28	1	TIMM10
HES4	1.13345e-32	0.855806	0.508	0.224	2.85516e-28	1	HES4
EIF2S2	1.27468e-32	0.434771	0.943	0.764	3.21092e-28	1	EIF2S2
TCP1	1.42218e-32	0.51354	0.871	0.598	3.58248e-28	1	TCP1
TRMT10C	1.48984e-32	0.749468	0.637	0.342	3.7529e-28	1	TRMT10C
SLC7A5	1.51367e-32	0.866037	0.521	0.238	3.81292e-28	1	SLC7A5
NOM1	1.62686e-32	0.761342	0.572	0.278	4.09805e-28	1	NOM1
CLUH	1.75241e-32	0.620784	0.643	0.346	4.41431e-28	1	CLUH
GAPDH	1.93633e-32	0.38369	0.994	0.935	4.87763e-28	1	GAPDH
VKORC1	2.29305e-32	0.665045	0.576	0.277	5.77619e-28	1	VKORC1
UBR7	2.46898e-32	1.67478	0.307	0.096	6.21937e-28	1	UBR7
MYCBP	2.51243e-32	0.66548	0.463	0.197	6.3288e-28	1	MYCBP
CHRAC1	2.58393e-32	0.683599	0.65	0.354	6.50893e-28	1	CHRAC1
PDIA6	3.67167e-32	0.484075	0.93	0.691	9.24892e-28	1	PDIA6
SDF2L1	3.77232e-32	0.763428	0.707	0.402	9.50247e-28	1	SDF2L1
RPS5	3.81914e-32	0.443211	0.986	0.894	9.62042e-28	1	RPS5
GMPS	3.85708e-32	0.702122	0.625	0.322	9.71598e-28	1	GMPS
MTDH	3.90478e-32	0.575946	0.953	0.777	9.83613e-28	1	MTDH
MIS12	4.11415e-32	1.02161	0.42	0.169	1.03635e-27	1	MIS12
SAMD1	4.30922e-32	0.604957	0.668	0.368	1.08549e-27	1	SAMD1
DDX46	4.62668e-32	0.52048	0.859	0.568	1.16546e-27	1	DDX46
CCT7	5.43425e-32	0.532688	0.854	0.585	1.36889e-27	1	CCT7
RMI1	5.55226e-32	1.01438	0.414	0.163	1.39861e-27	1	RMI1
MRPL1	5.83713e-32	0.727963	0.691	0.4	1.47037e-27	1	MRPL1
SNX5	7.21919e-32	0.46886	0.795	0.492	1.81851e-27	1	SNX5
GNPNAT1	8.39463e-32	0.639552	0.805	0.522	2.11461e-27	1	GNPNAT1
IARS2	8.54619e-32	0.624442	0.816	0.514	2.15278e-27	1	IARS2
SF3B3	8.80296e-32	0.671065	0.715	0.413	2.21747e-27	1	SF3B3
PCBD1	9.20169e-32	0.640064	0.799	0.547	2.31791e-27	1	PCBD1
XRCC5	9.41079e-32	0.567784	0.908	0.688	2.37058e-27	1	XRCC5
NFATC2IP	1.06871e-31	0.703319	0.707	0.408	2.69208e-27	1	NFATC2IP
NUDC	1.09883e-31	0.565602	0.898	0.628	2.76795e-27	1	NUDC
JPT2	1.11642e-31	0.71483	0.658	0.357	2.81226e-27	1	JPT2
GARS	1.23733e-31	0.58719	0.697	0.395	3.11683e-27	1	GARS
IGFBP41	1.85806e-31	0.804007	0.676	0.372	4.68046e-27	1	IGFBP4
RCN2	2.00781e-31	0.501427	0.734	0.44	5.05769e-27	1	RCN2
BOP1	2.35822e-31	0.960127	0.57	0.289	5.94036e-27	1	BOP1
AHSA1	2.43261e-31	0.509111	0.826	0.548	6.12775e-27	1	AHSA1
WDR5	3.37769e-31	0.908921	0.467	0.202	8.50841e-27	1	WDR5
G3BP1	4.52741e-31	0.50764	0.928	0.706	1.14045e-26	1	G3BP1
MRM2	4.64191e-31	1.15807	0.402	0.163	1.1693e-26	1	MRM2
SRRT	5.04593e-31	0.644314	0.566	0.273	1.27107e-26	1	SRRT
RRP1B	5.17995e-31	0.808955	0.598	0.311	1.30483e-26	1	RRP1B
HSP90B1	5.51913e-31	0.53897	0.984	0.88	1.39027e-26	1	HSP90B1
PCNT	6.59311e-31	0.791626	0.48	0.208	1.66081e-26	1	PCNT
RPS23	7.95065e-31	0.411547	0.979	0.891	2.00277e-26	1	RPS23
PTDSS1	8.73725e-31	0.937634	0.494	0.231	2.20091e-26	1	PTDSS1
LRP8	1.0364e-30	1.02565	0.463	0.203	2.61069e-26	1	LRP8
COX8A	1.15391e-30	0.471845	0.936	0.756	2.9067e-26	1	COX8A
ANAPC1	1.27779e-30	0.828435	0.463	0.198	3.21875e-26	1	ANAPC1
CHRNA5	1.31062e-30	1.56043	0.256	0.07	3.30146e-26	1	CHRNA5
FAM136A	1.45613e-30	0.551955	0.756	0.45	3.668e-26	1	FAM136A
SNRPD3	1.49773e-30	0.436152	0.871	0.645	3.77279e-26	1	SNRPD3
FBXO45	1.88933e-30	0.823004	0.502	0.226	4.75921e-26	1	FBXO45
LIN54	1.9003e-30	1.20879	0.314	0.105	4.78687e-26	1	LIN54
RBBP4	1.95409e-30	0.461318	0.867	0.596	4.92234e-26	1	RBBP4
RPLP0	2.34237e-30	0.369715	0.992	0.913	5.90042e-26	1	RPLP0
AGPAT5	3.21785e-30	0.826176	0.596	0.304	8.10577e-26	1	AGPAT5
SAP30	3.41208e-30	1.0646	0.418	0.173	8.59502e-26	1	SAP30
TYW3	3.54957e-30	0.893502	0.514	0.238	8.94137e-26	1	TYW3
SLIRP	3.72346e-30	0.574392	0.861	0.633	9.37941e-26	1	SLIRP
GART	4.14558e-30	0.673711	0.74	0.458	1.04427e-25	1	GART
FN3KRP	4.24157e-30	1.10015	0.332	0.116	1.06845e-25	1	FN3KRP
GLRX5	4.29515e-30	0.55389	0.695	0.413	1.08195e-25	1	GLRX5
THRAP3	4.7114e-30	0.470998	0.898	0.635	1.1868e-25	1	THRAP3
NFIC	4.9395e-30	0.59896	0.771	0.466	1.24426e-25	1	NFIC
EXOSC9	5.00616e-30	0.871074	0.387	0.154	1.26105e-25	1	EXOSC9
ETV4	5.55723e-30	0.825345	0.311	0.102	1.39987e-25	1	ETV4
SLC38A1	5.74205e-30	0.680558	0.682	0.378	1.44642e-25	1	SLC38A1
SLC25A10	6.47452e-30	0.771039	0.406	0.163	1.63093e-25	1	SLC25A10
PTBP1	9.02633e-30	0.454118	0.916	0.68	2.27373e-25	1	PTBP1
HOXA10	1.06854e-29	0.717715	0.719	0.418	2.69164e-25	1	HOXA10
LSM2	1.08226e-29	0.728154	0.662	0.41	2.72623e-25	1	LSM2
RPL8	1.27192e-29	0.442719	0.996	0.953	3.20396e-25	1	RPL8
NCAPH2	1.29161e-29	0.914253	0.35	0.13	3.25357e-25	1	NCAPH2
PSME2	1.42527e-29	0.523214	0.957	0.768	3.59025e-25	1	PSME2
NUP58	1.58183e-29	0.615973	0.699	0.416	3.98463e-25	1	NUP58
HNRNPF	1.59437e-29	0.465535	0.939	0.722	4.01621e-25	1	HNRNPF
CHAC2	1.78986e-29	1.25995	0.305	0.101	4.50866e-25	1	CHAC2
TIMM23	1.7951e-29	0.953531	0.471	0.21	4.52187e-25	1	TIMM23
PSMG1	1.81947e-29	0.787214	0.533	0.267	4.58325e-25	1	PSMG1
HNRNPUL1	1.8814e-29	0.630231	0.797	0.507	4.73924e-25	1	HNRNPUL1
NOP14	1.99702e-29	0.586418	0.68	0.385	5.03049e-25	1	NOP14
POLR2E	2.0161e-29	0.520307	0.688	0.383	5.07856e-25	1	POLR2E
CASP2	2.2292e-29	0.873763	0.473	0.219	5.61535e-25	1	CASP2
PELP1	2.34236e-29	0.644724	0.639	0.343	5.90041e-25	1	PELP1
WDR43	2.76196e-29	0.503575	0.857	0.578	6.95737e-25	1	WDR43
TMEM38B	2.8489e-29	0.703757	0.459	0.2	7.17639e-25	1	TMEM38B
SRSF2	3.04754e-29	0.462573	0.916	0.699	7.67675e-25	1	SRSF2
PRPS2	3.16868e-29	0.469343	0.506	0.231	7.98192e-25	1	PRPS2
EEF1E1	3.38924e-29	0.726363	0.564	0.294	8.53751e-25	1	EEF1E1
UMPS	3.49282e-29	0.836841	0.551	0.279	8.79841e-25	1	UMPS
SUMO3	3.76142e-29	0.540862	0.76	0.474	9.47501e-25	1	SUMO3
ACP1	5.09418e-29	0.539173	0.795	0.522	1.28322e-24	1	ACP1
C12orf29	5.19609e-29	1.0607	0.441	0.194	1.30889e-24	1	C12orf29
CS	5.46715e-29	0.610457	0.752	0.467	1.37718e-24	1	CS
NOP58	6.36486e-29	0.527043	0.811	0.546	1.60331e-24	1	NOP58
UQCC2	6.39696e-29	0.727765	0.564	0.298	1.61139e-24	1	UQCC2
PRPF19	7.8591e-29	0.70109	0.646	0.357	1.97971e-24	1	PRPF19
HAUS1	8.41321e-29	0.929727	0.289	0.093	2.11929e-24	1	HAUS1
ITGAE	8.69175e-29	1.01473	0.426	0.189	2.18945e-24	1	ITGAE
HMCES	9.0358e-29	0.790469	0.518	0.253	2.27612e-24	1	HMCES
AARS	9.30987e-29	0.724375	0.576	0.292	2.34516e-24	1	AARS
ACTL6A	9.37327e-29	0.576509	0.562	0.284	2.36113e-24	1	ACTL6A
CARM1	1.02562e-28	0.682079	0.691	0.401	2.58354e-24	1	CARM1
PCGF6	1.11347e-28	0.989063	0.334	0.124	2.80483e-24	1	PCGF6
CDKN2D	1.27233e-28	1.14398	0.301	0.099	3.205e-24	1	CDKN2D
YWHAE	1.3329e-28	0.413084	0.961	0.816	3.35758e-24	1	YWHAE
ANP32A	1.3713e-28	0.52406	0.812	0.559	3.45429e-24	1	ANP32A
PRR34-AS1	1.39524e-28	0.834672	0.65	0.363	3.51461e-24	1	PRR34-AS1
TP53	1.40596e-28	0.618543	0.66	0.367	3.54161e-24	1	TP53
DCXR	1.54009e-28	0.522219	0.754	0.484	3.87948e-24	1	DCXR
LYRM7	1.69821e-28	0.753891	0.457	0.203	4.2778e-24	1	LYRM7
NAA50	1.74311e-28	0.542518	0.826	0.573	4.39089e-24	1	NAA50
CKAP4	1.87812e-28	0.699078	0.674	0.373	4.73099e-24	1	CKAP4
XRCC4	2.03764e-28	0.918753	0.307	0.106	5.13282e-24	1	XRCC4
NT5DC3	2.0771e-28	1.08892	0.453	0.2	5.23223e-24	1	NT5DC3
MCMBP	2.13896e-28	0.444533	0.715	0.435	5.38804e-24	1	MCMBP
IPO9	2.20726e-28	0.768451	0.498	0.233	5.56008e-24	1	IPO9
HIST2H2AC	2.20866e-28	1.5662	0.338	0.135	5.56362e-24	1	HIST2H2AC
TIPIN	2.2887e-28	1.15317	0.322	0.113	5.76523e-24	1	TIPIN
LDHB	2.49301e-28	0.483416	0.803	0.523	6.2799e-24	1	LDHB
RSRC1	2.65259e-28	0.49419	0.754	0.459	6.68188e-24	1	RSRC1
FARSB	2.73856e-28	0.77384	0.588	0.303	6.89842e-24	1	FARSB
RUSC1	3.02876e-28	0.598956	0.572	0.289	7.62944e-24	1	RUSC1
TIMM50	3.03246e-28	0.77119	0.471	0.219	7.63877e-24	1	TIMM50
NDUFV1	3.09344e-28	0.428947	0.773	0.479	7.79238e-24	1	NDUFV1
UTP4	3.36585e-28	0.980251	0.443	0.194	8.47857e-24	1	UTP4
SNHG15	3.40268e-28	0.66631	0.586	0.306	8.57135e-24	1	SNHG15
[truncated: 6,536 more rows]
